# Supplementary material
Source: Springer Nature journal article supplement (https://www.springermedizin.de/resource/supplementary/13058_2013_3415_MOESM12_ESM.zip/9704120)

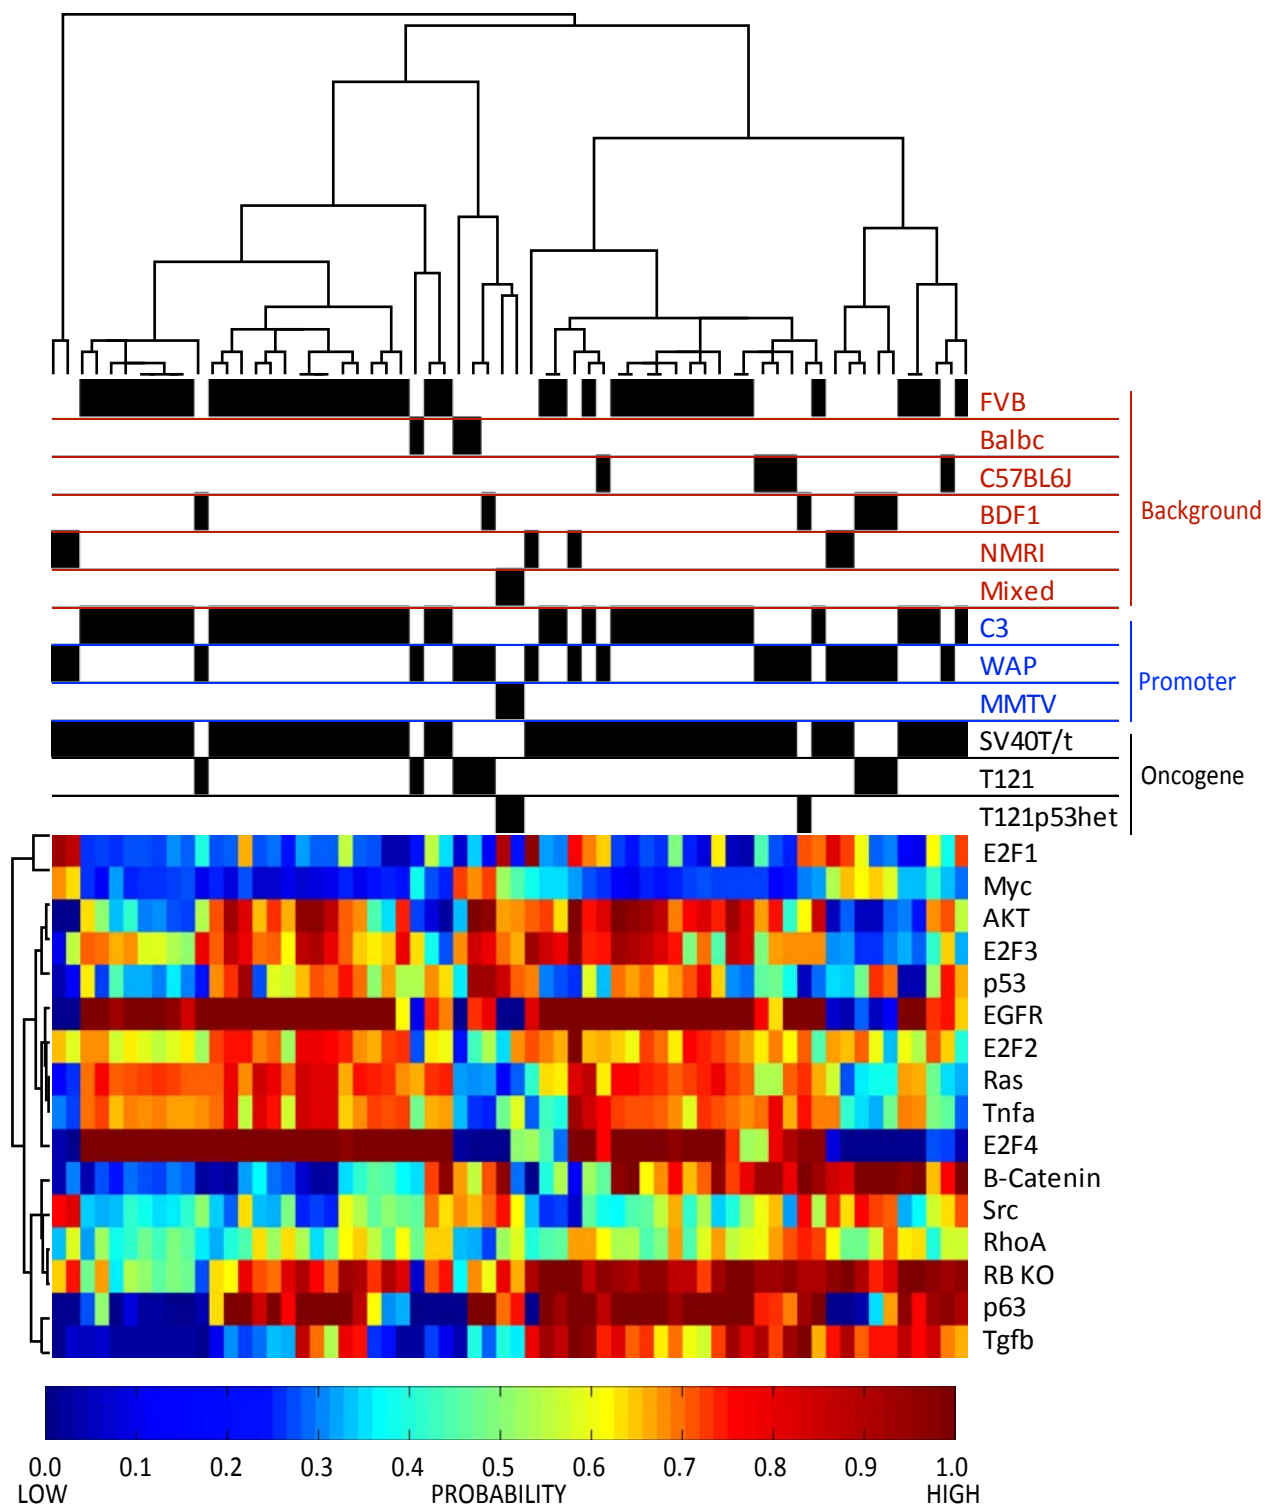

Supplement: MOESM12 [file 9704120]

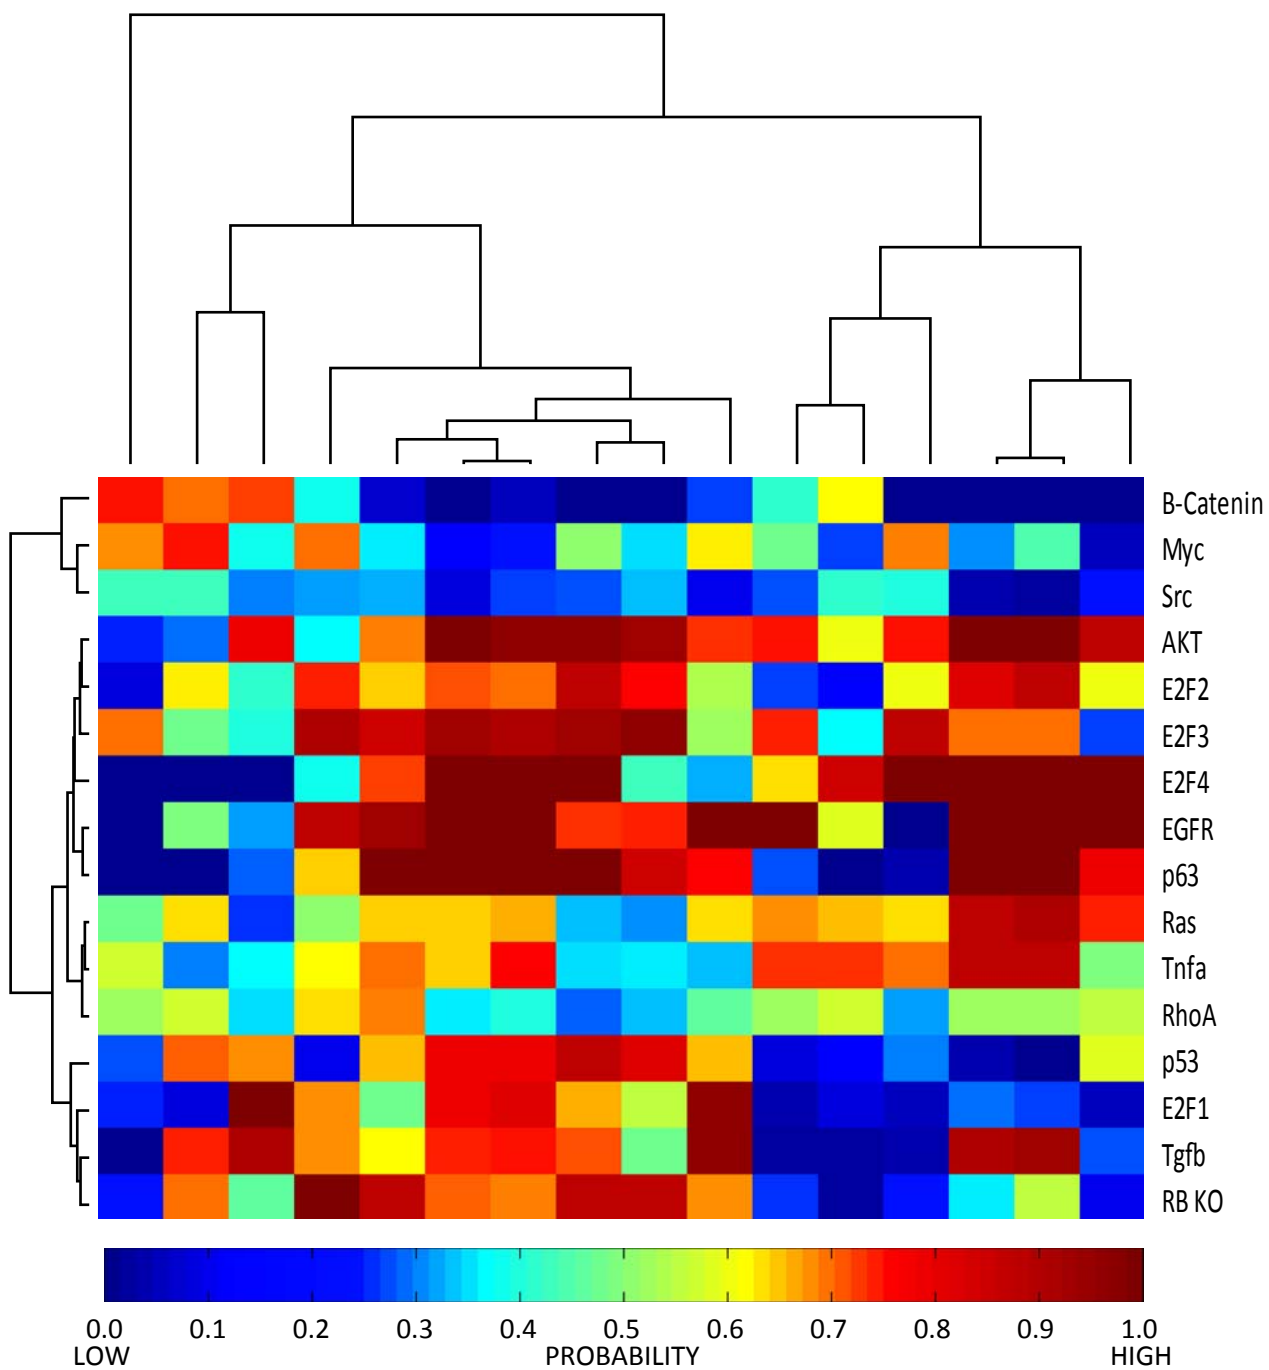

Supplement: MOESM12 [file 9704120]

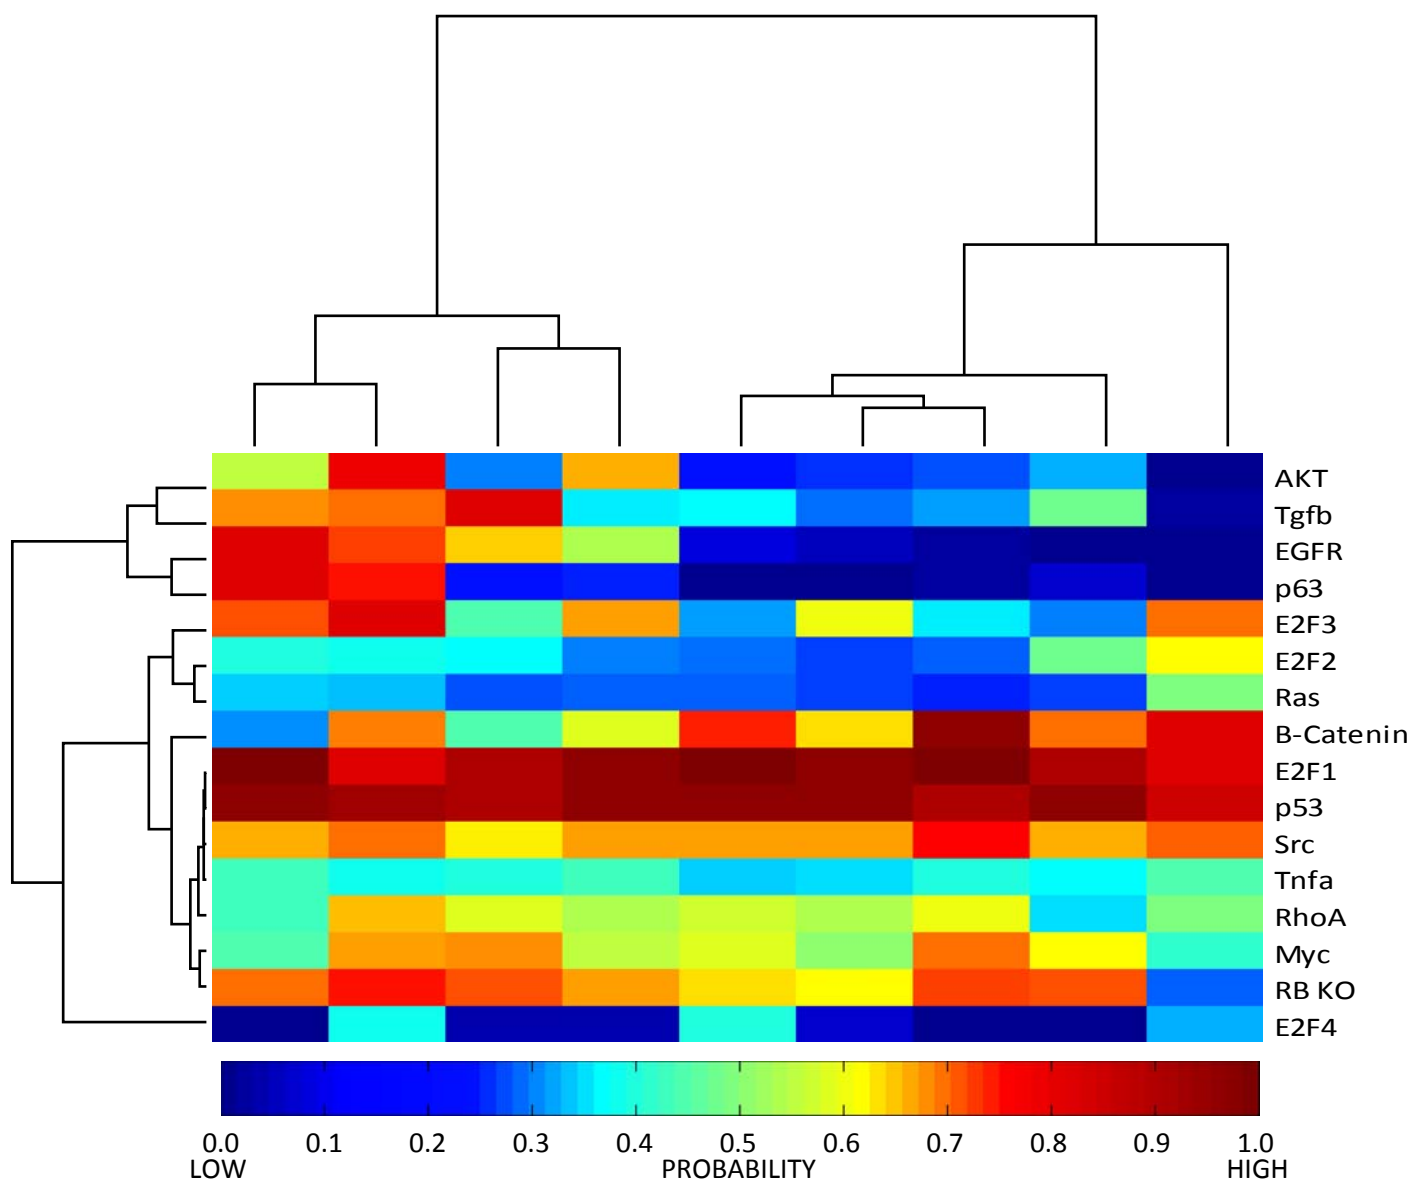

Supplement: MOESM12 [file 9704120]

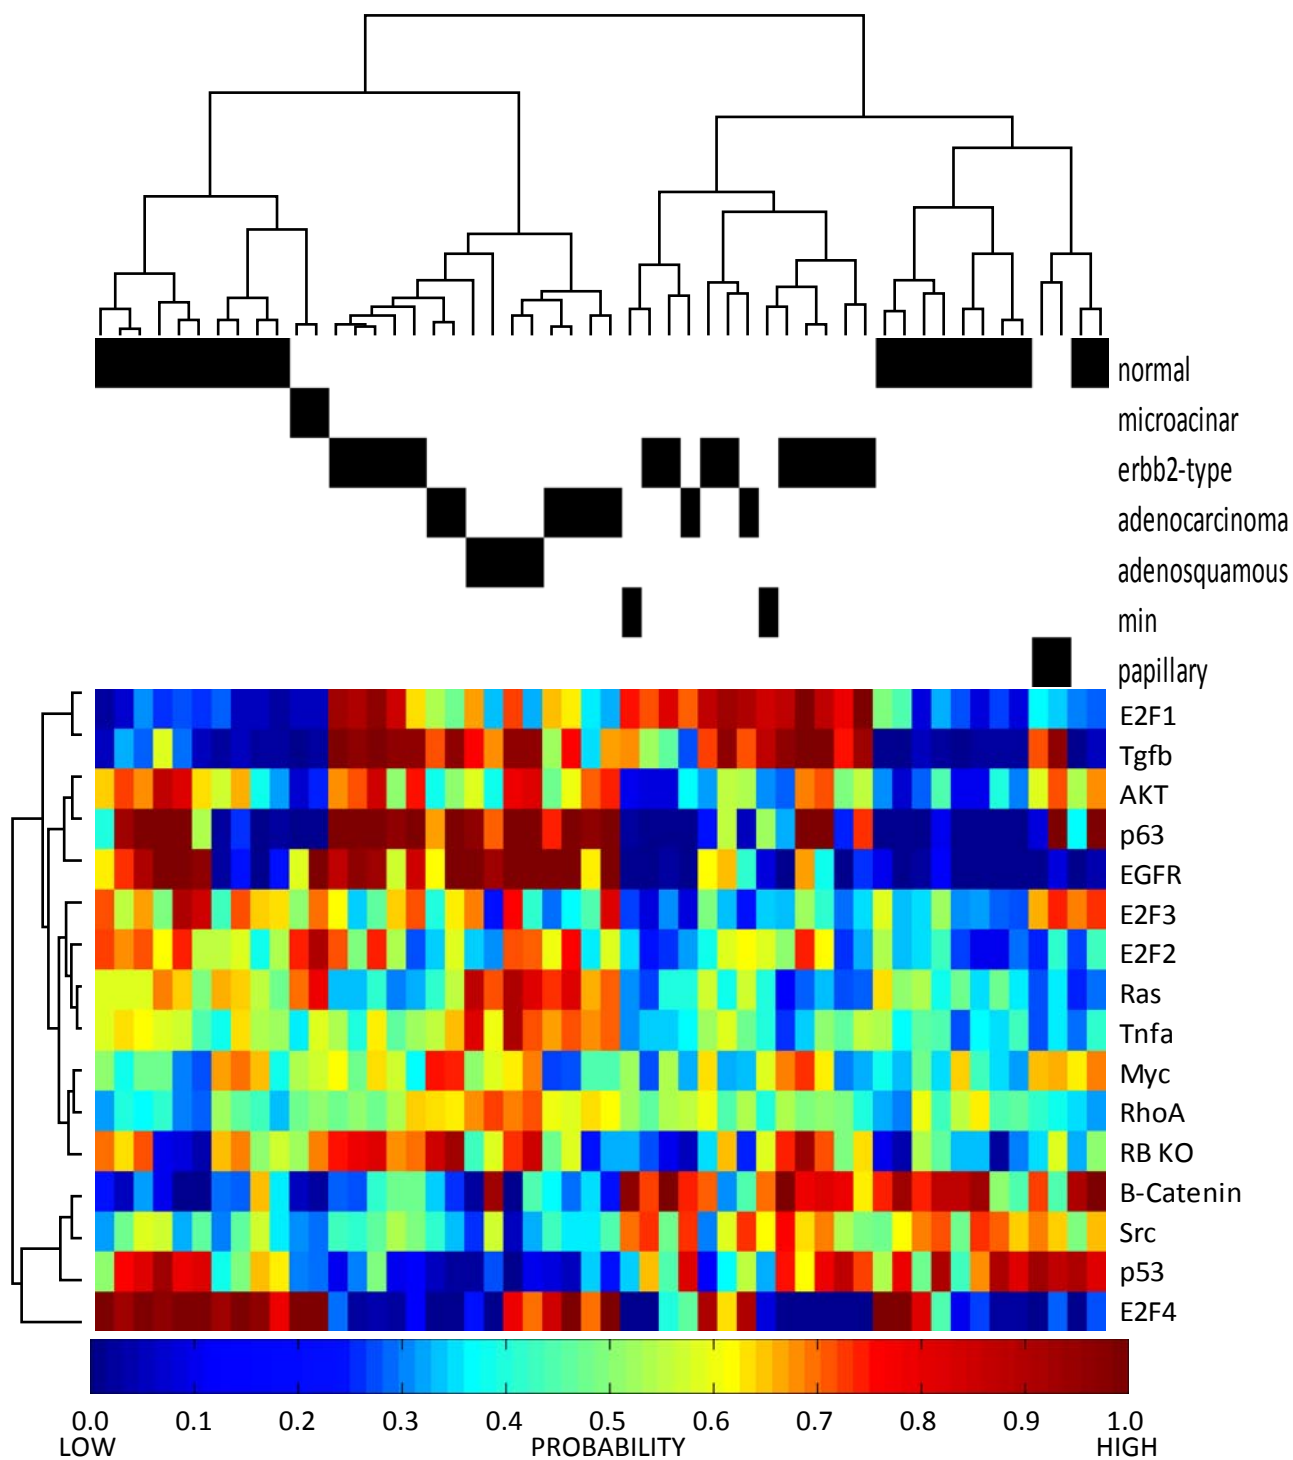

Supplement: MOESM12 [file 9704120]

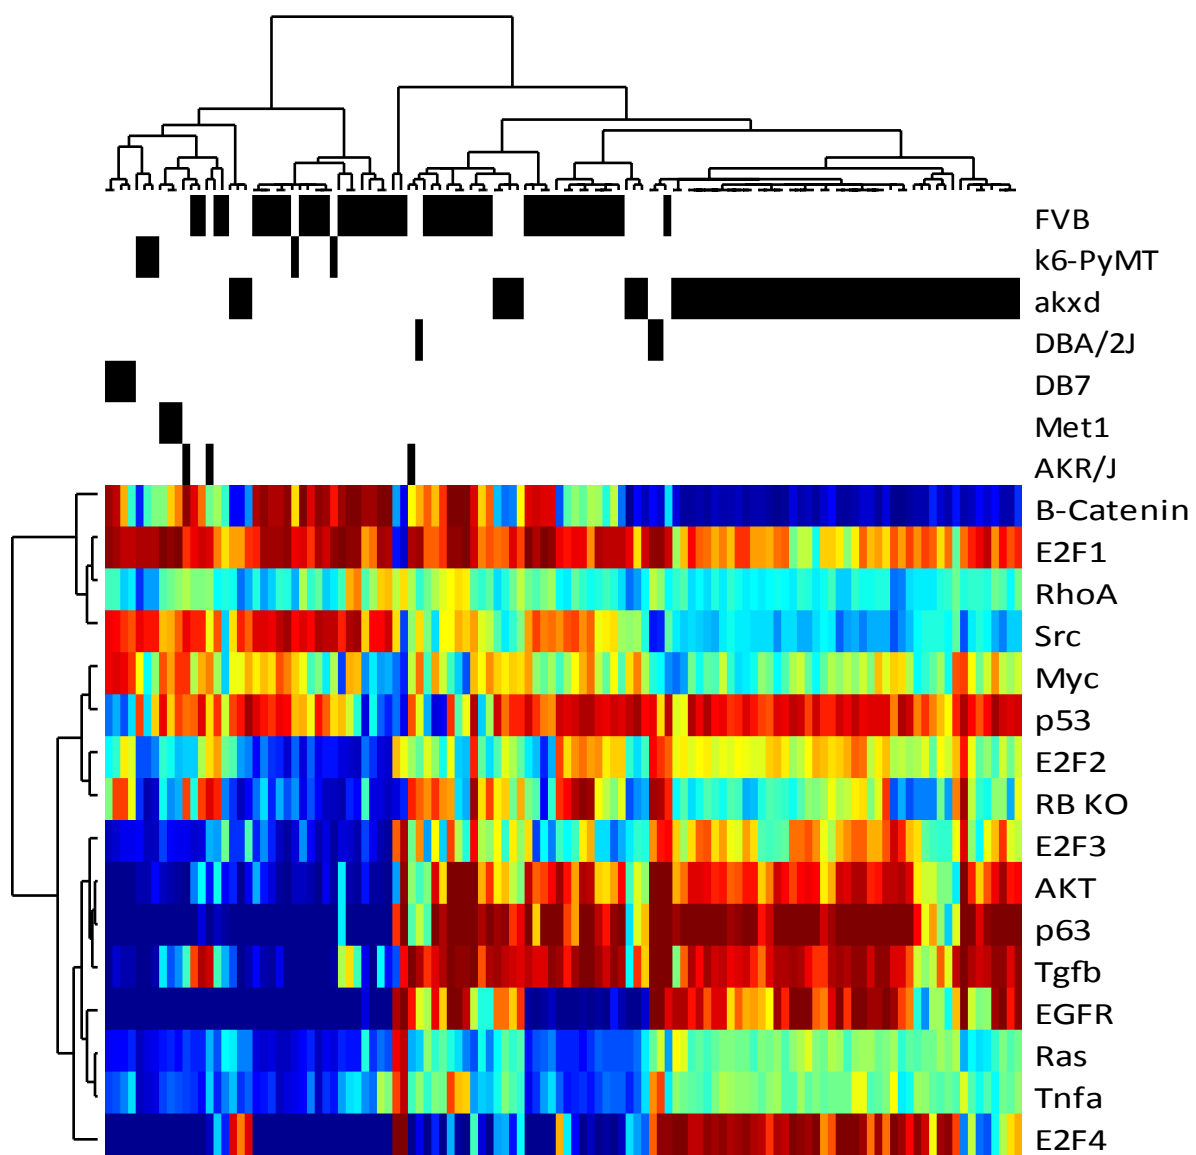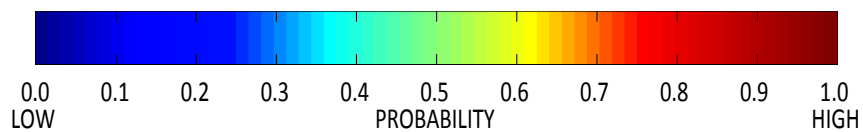

Supplement: MOESM12 [file 9704120]

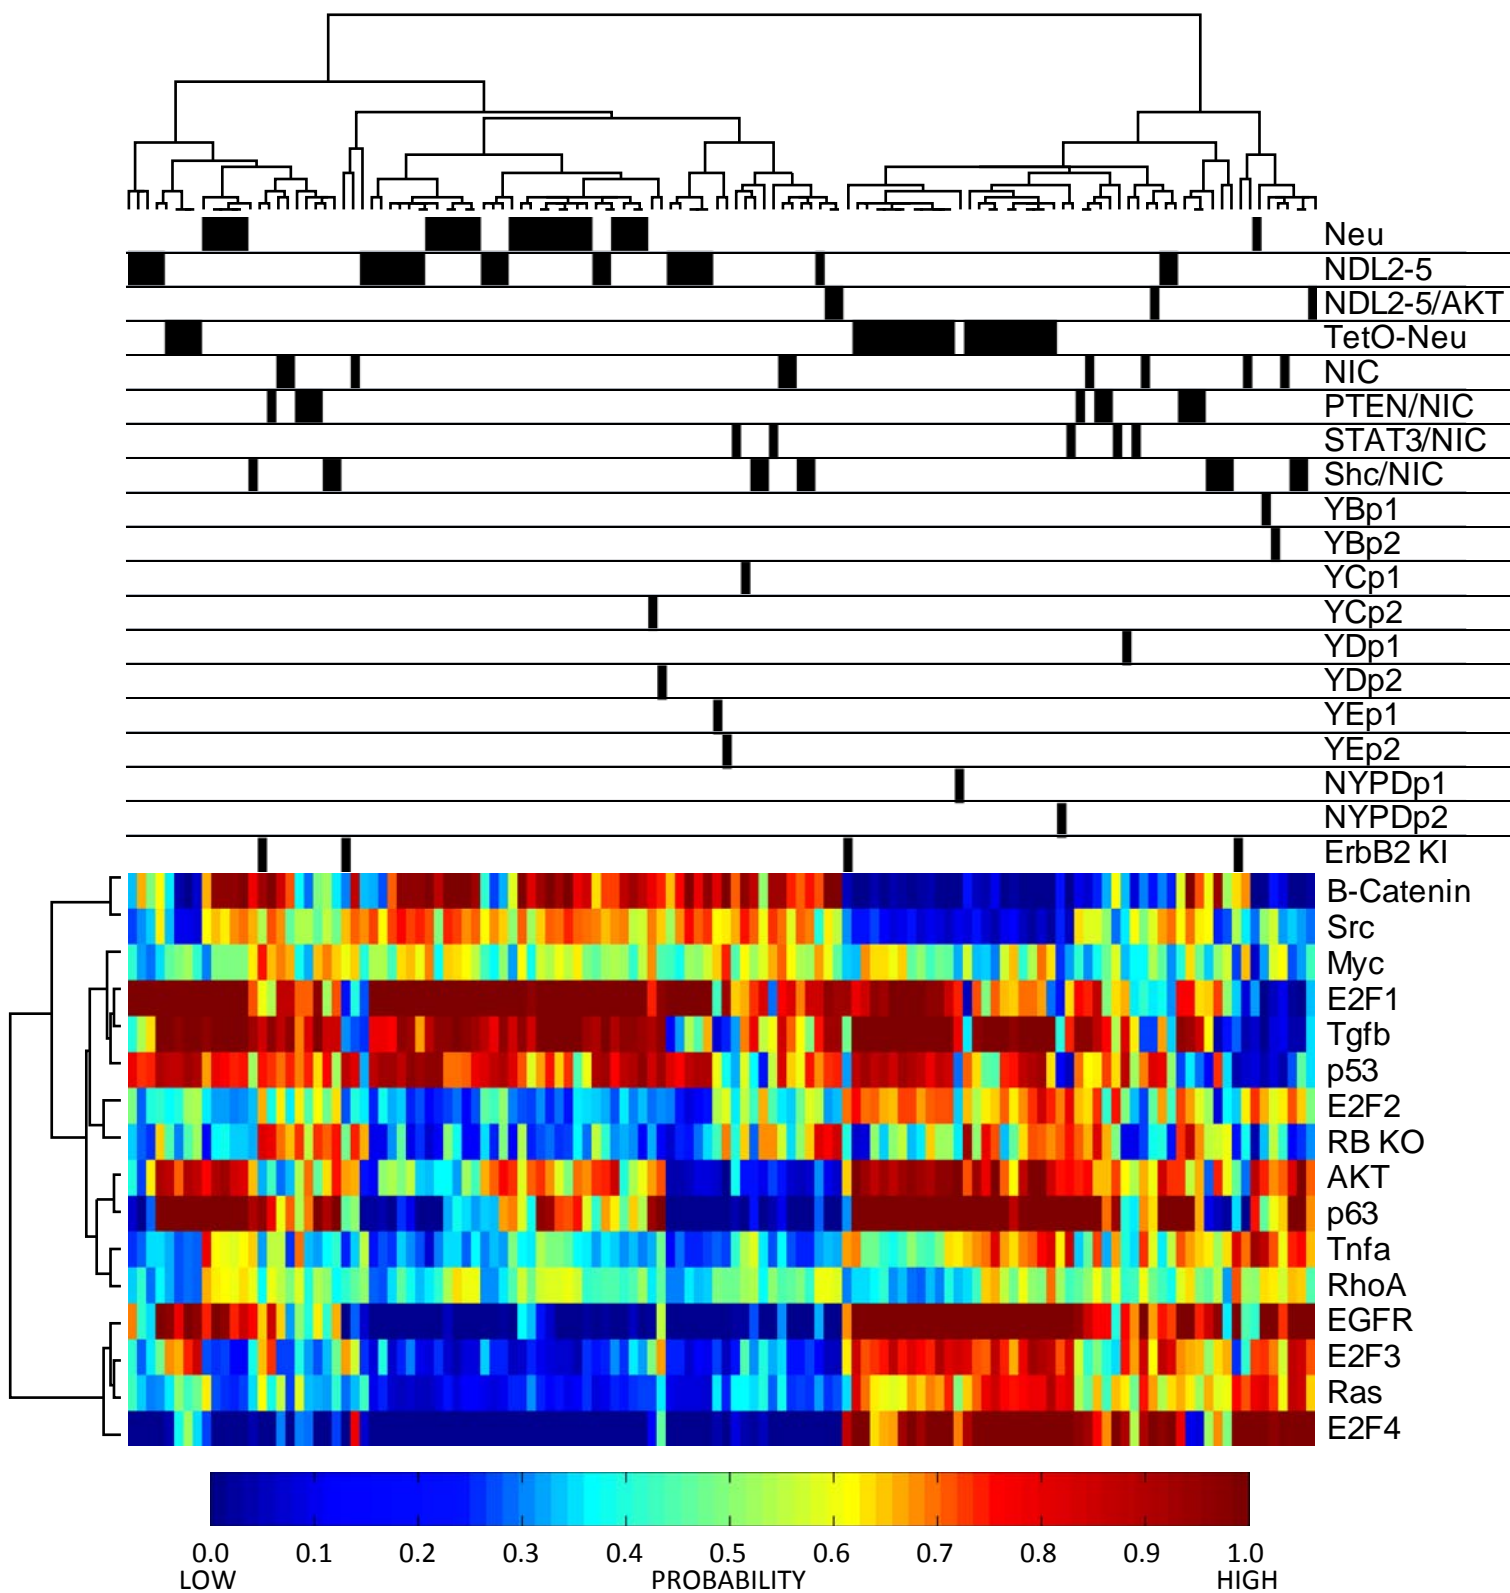

Supplement: MOESM12 [file 9704120]

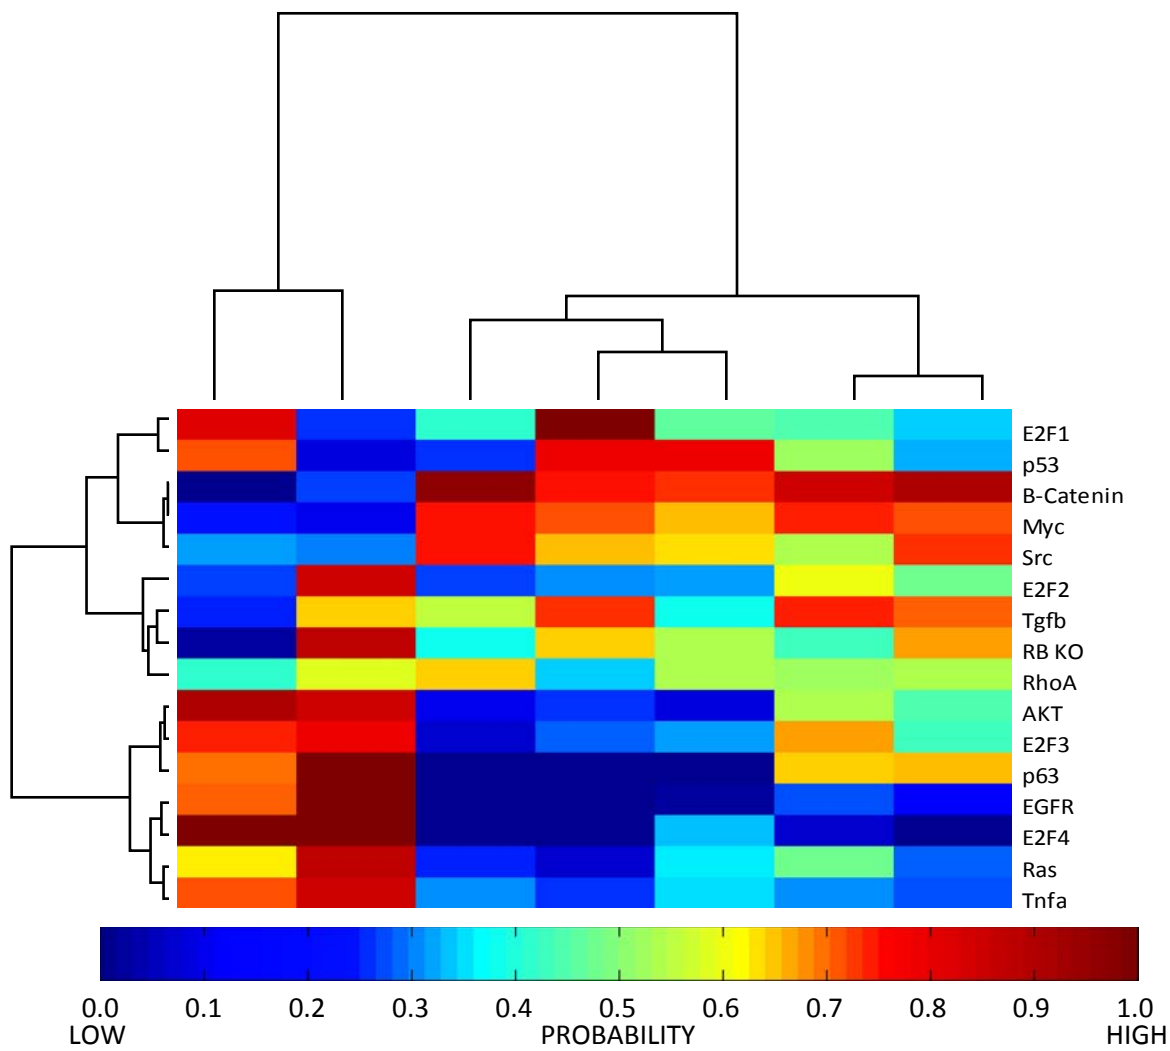

Supplement: MOESM12 [file 9704120]

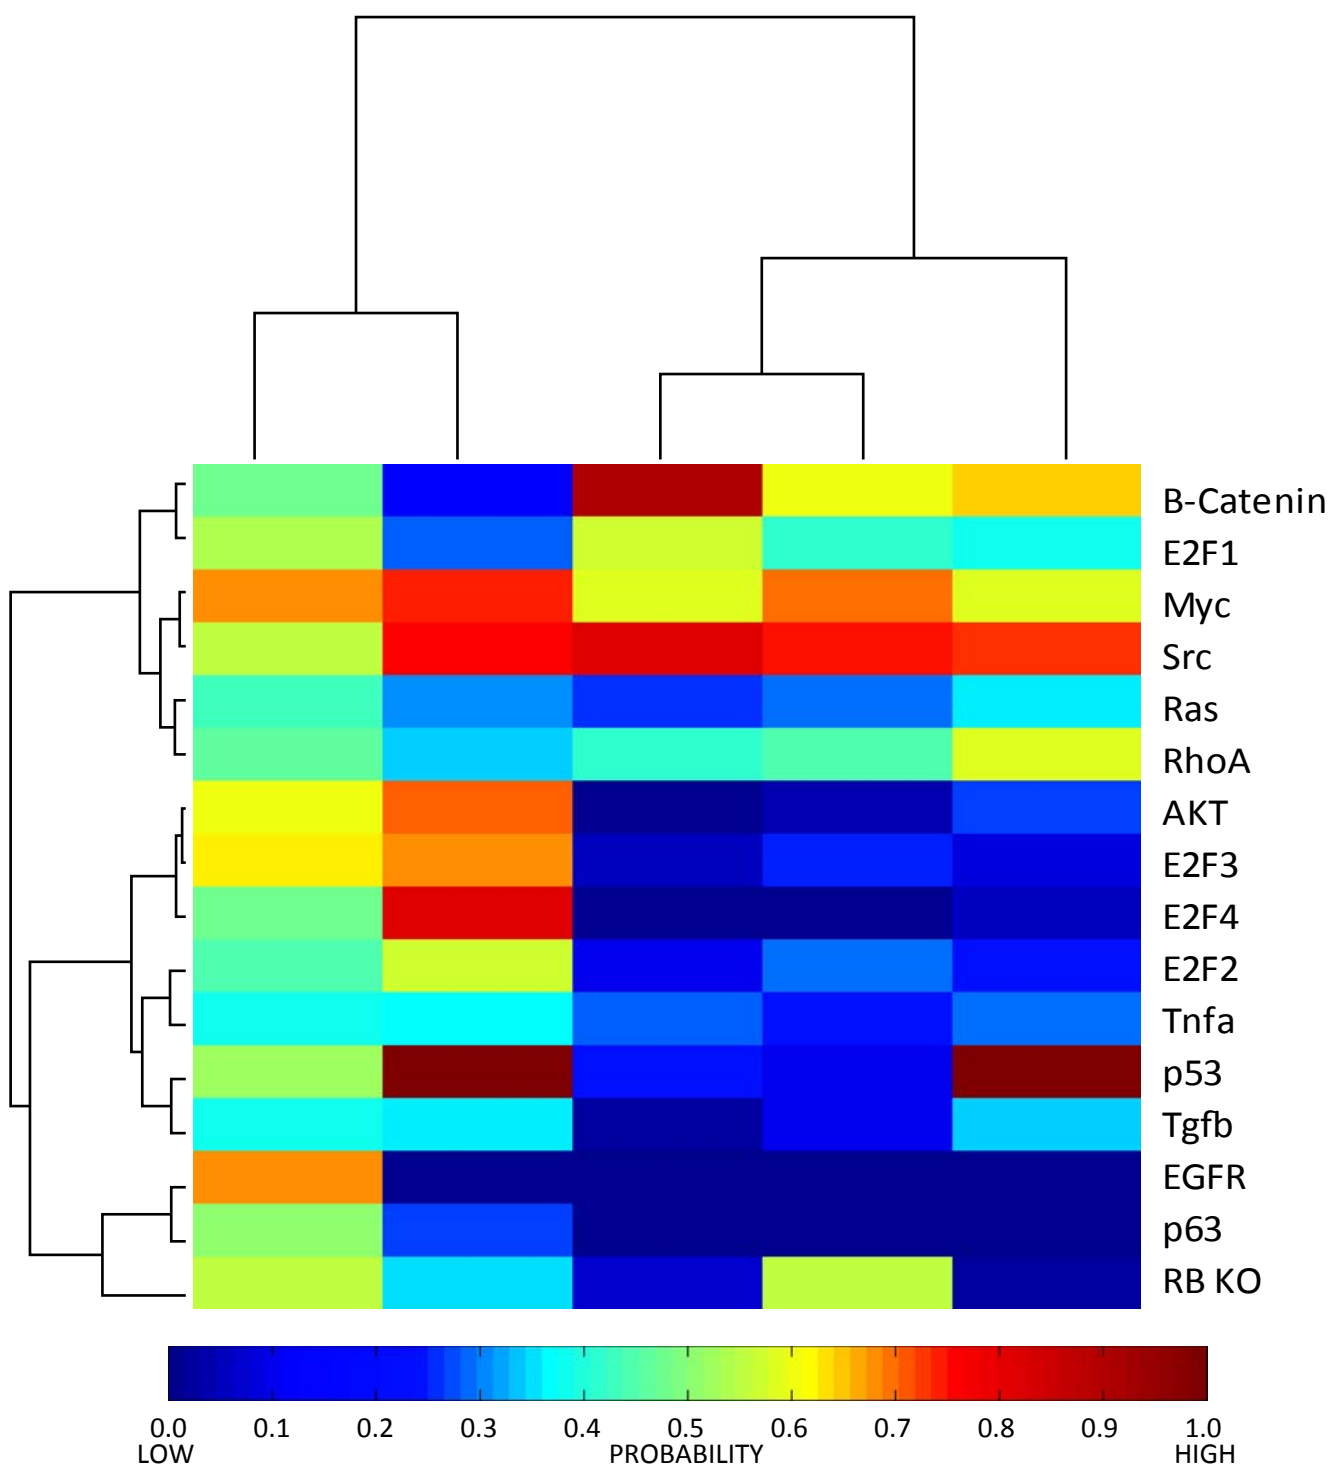

Supplement: MOESM12 [file 9704120]

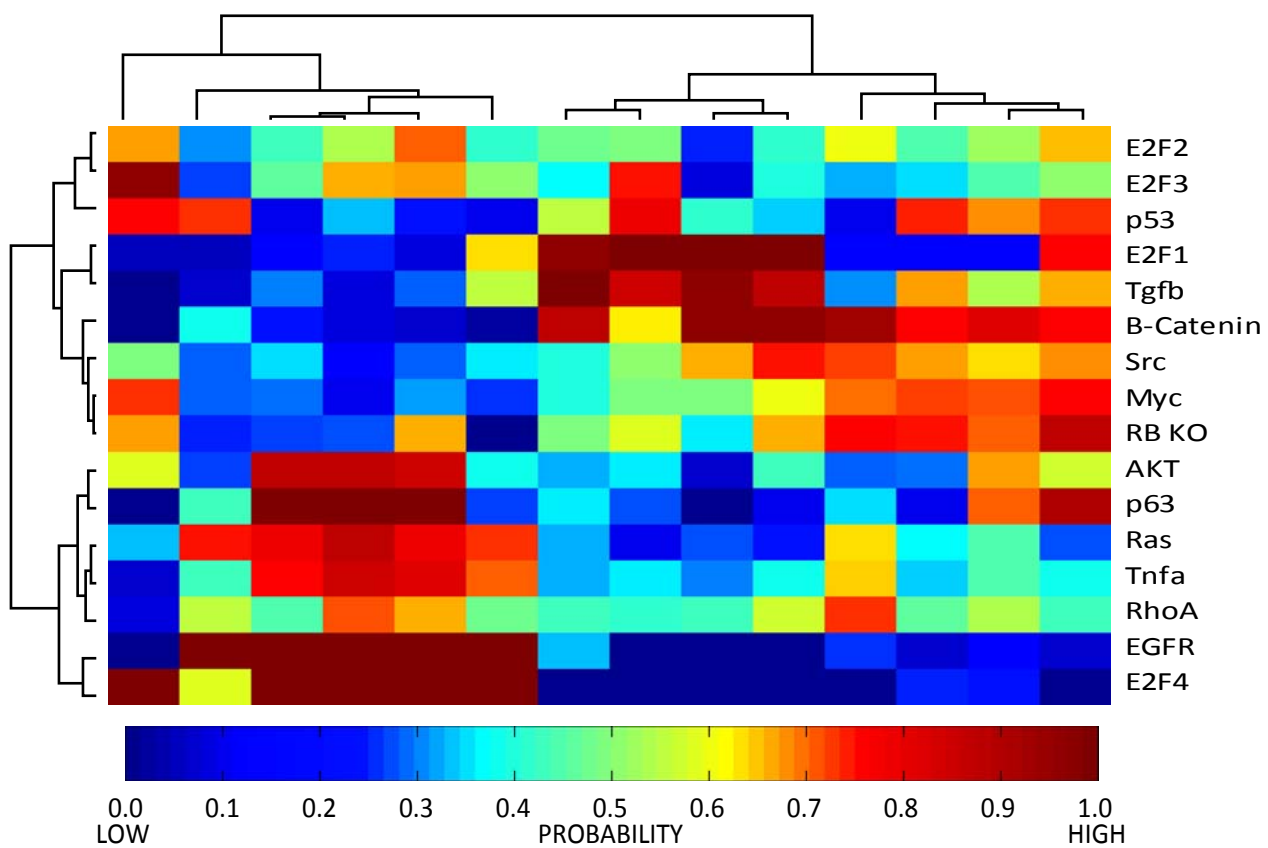

Supplement: MOESM12 [file 9704120]

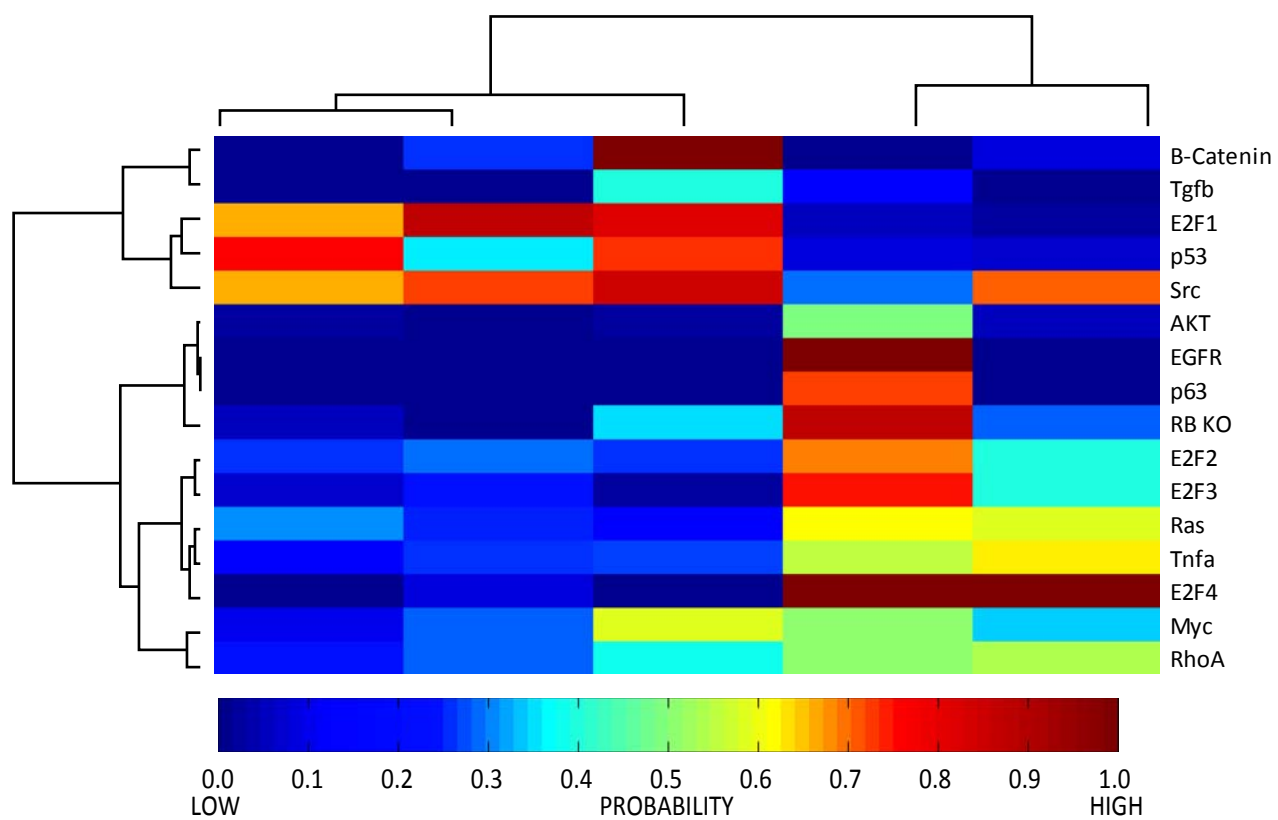

Supplement: MOESM12 [file 9704120]

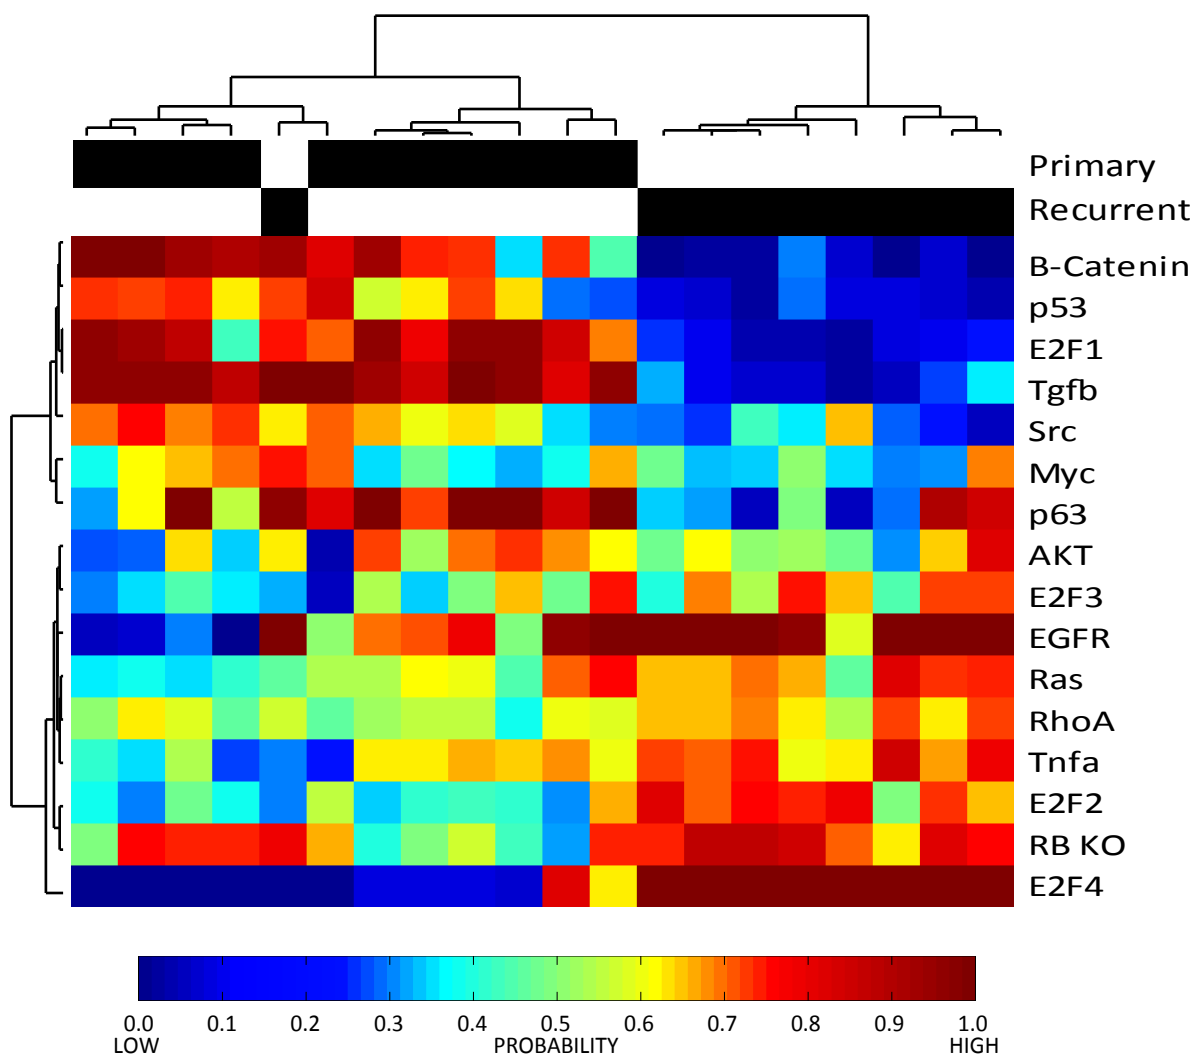

Supplement: MOESM12 [file 9704120]

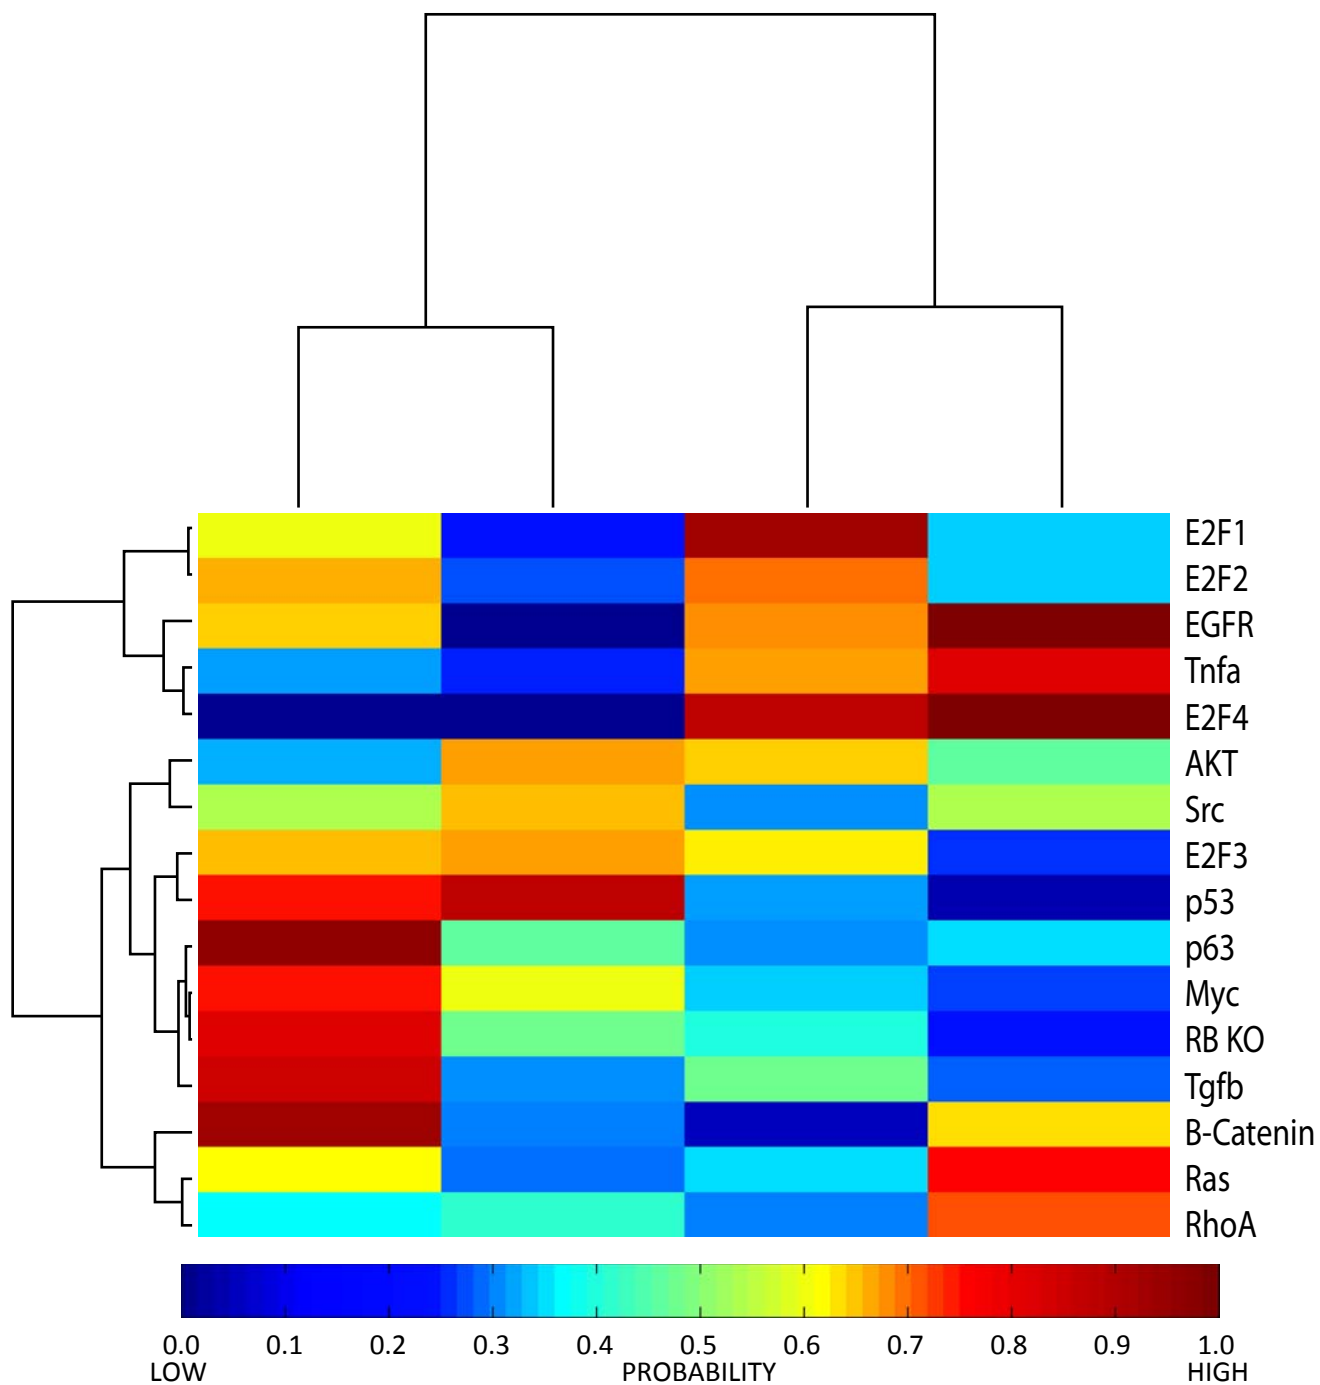

Supplement: MOESM12 [file 9704120]

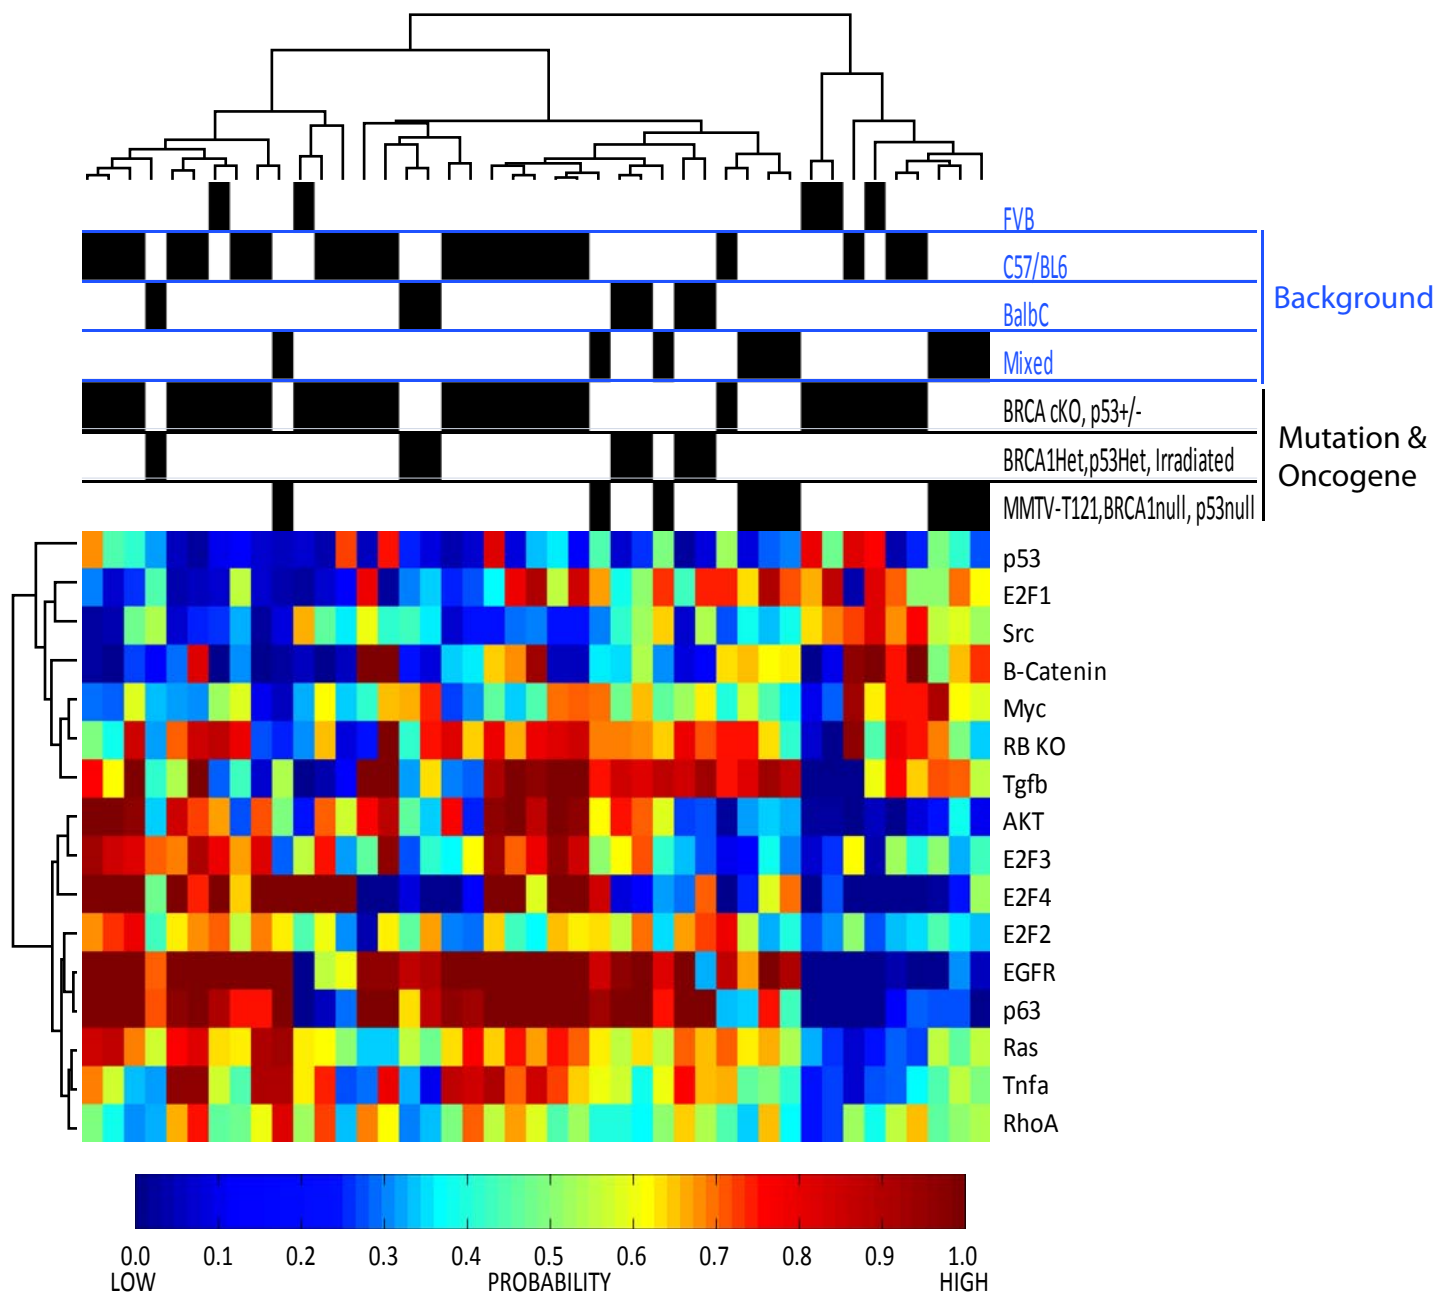

Supplement: MOESM12 [file 9704120]

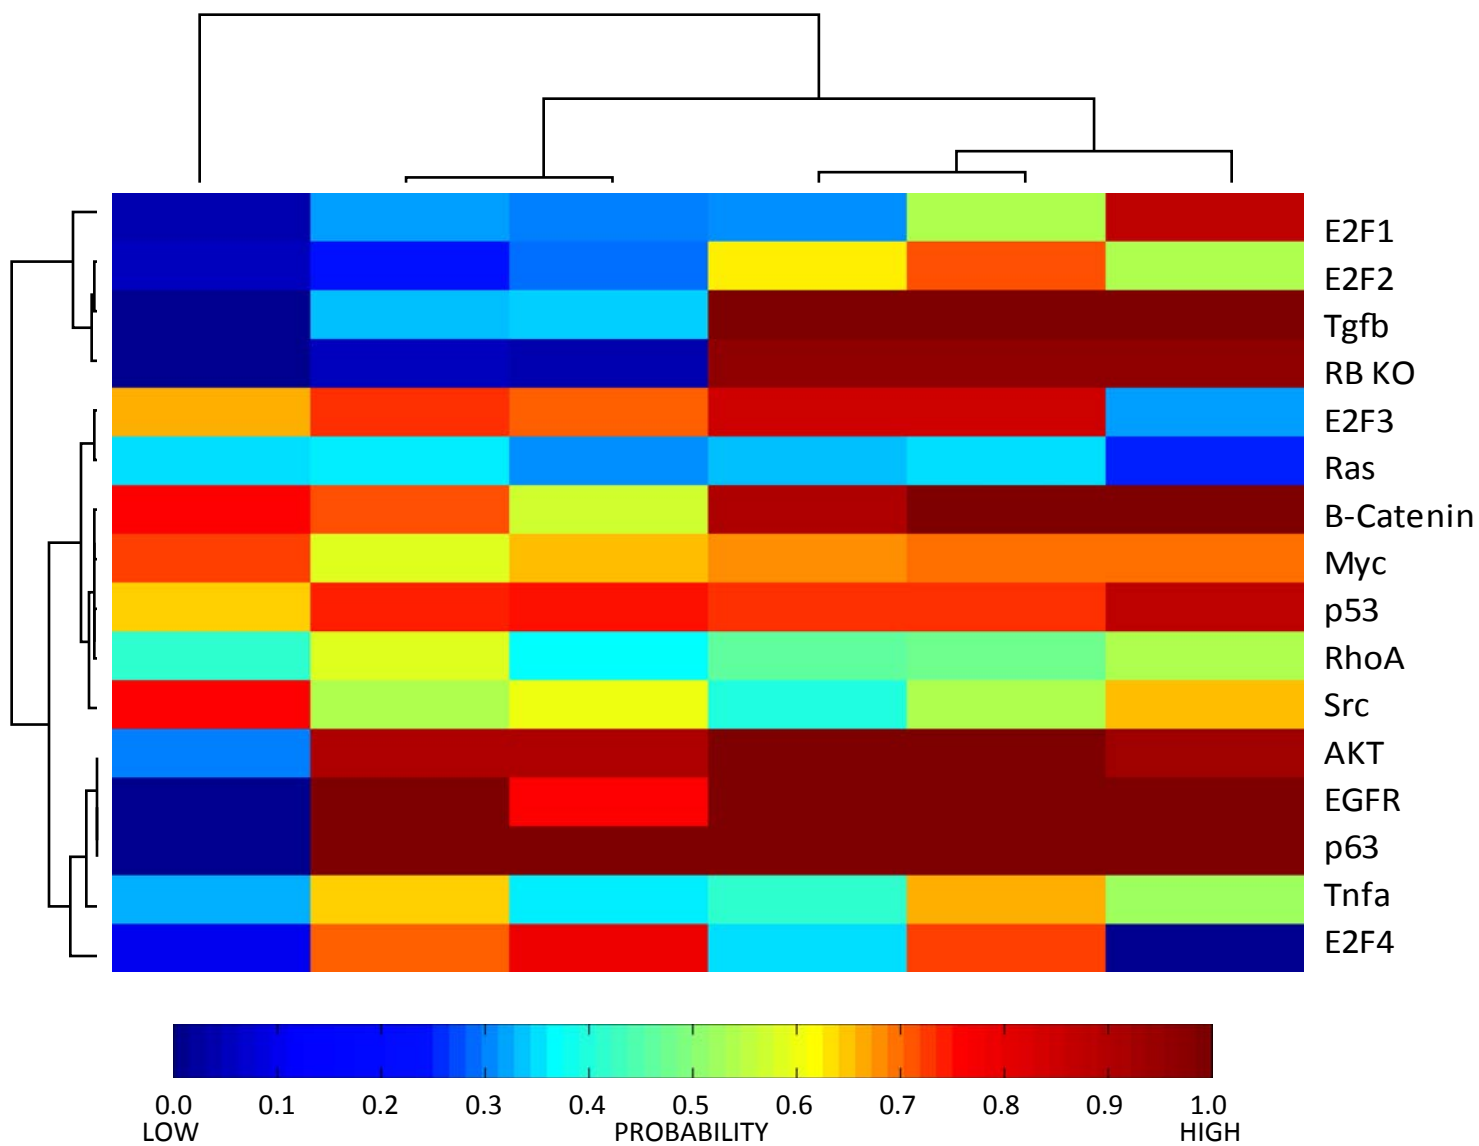

Supplement: MOESM12 [file 9704120]

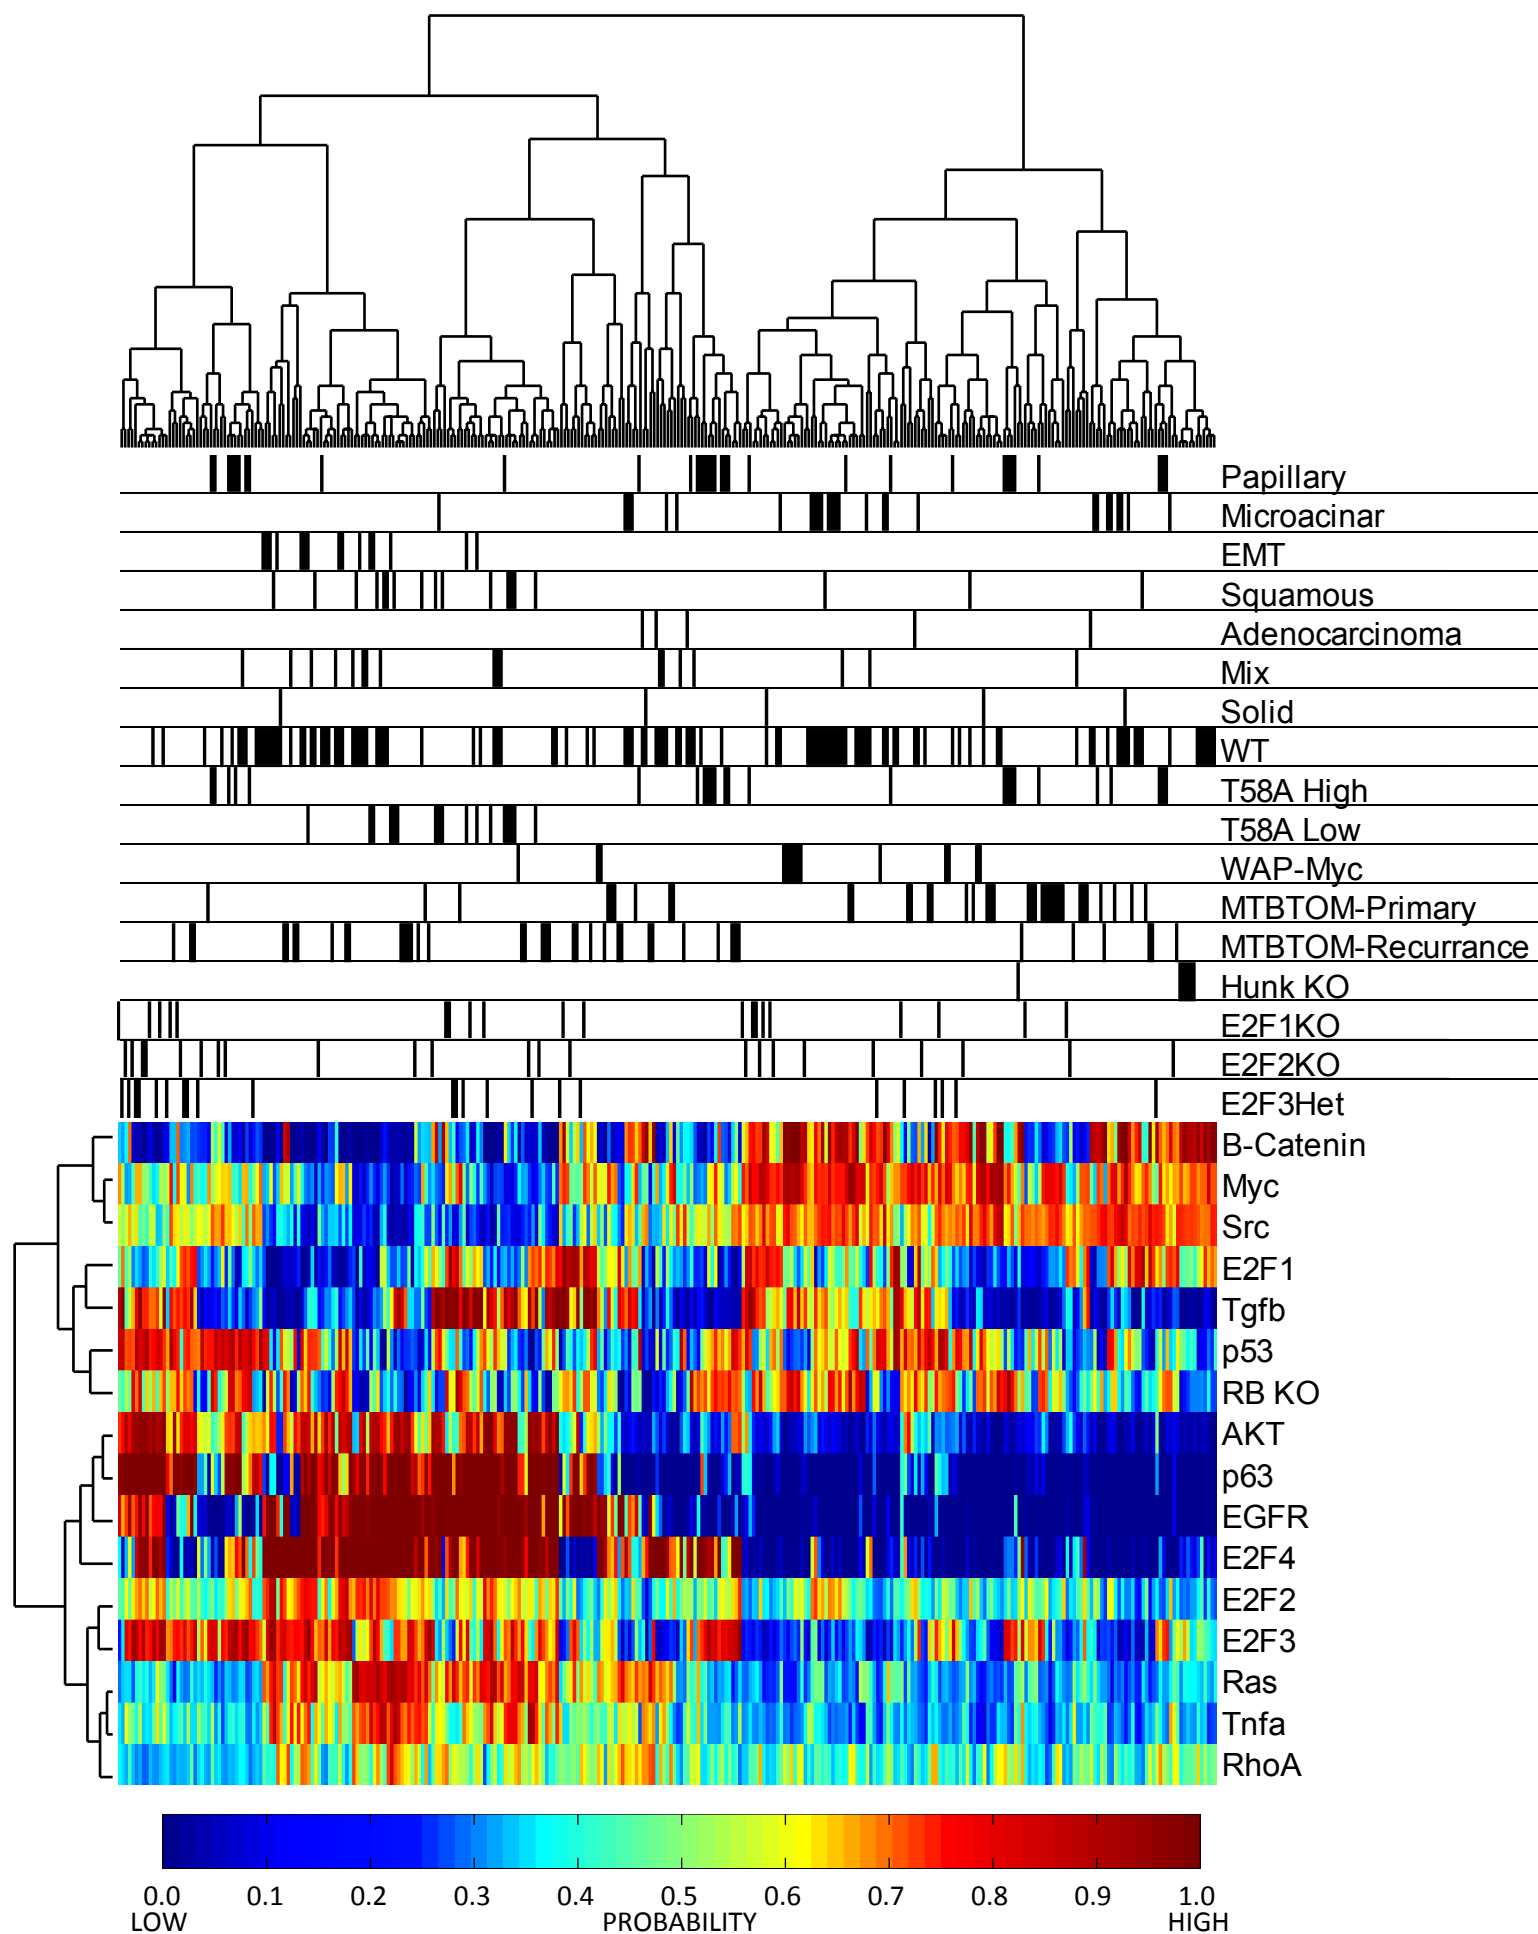

Supplement: MOESM12 [file 9704120]

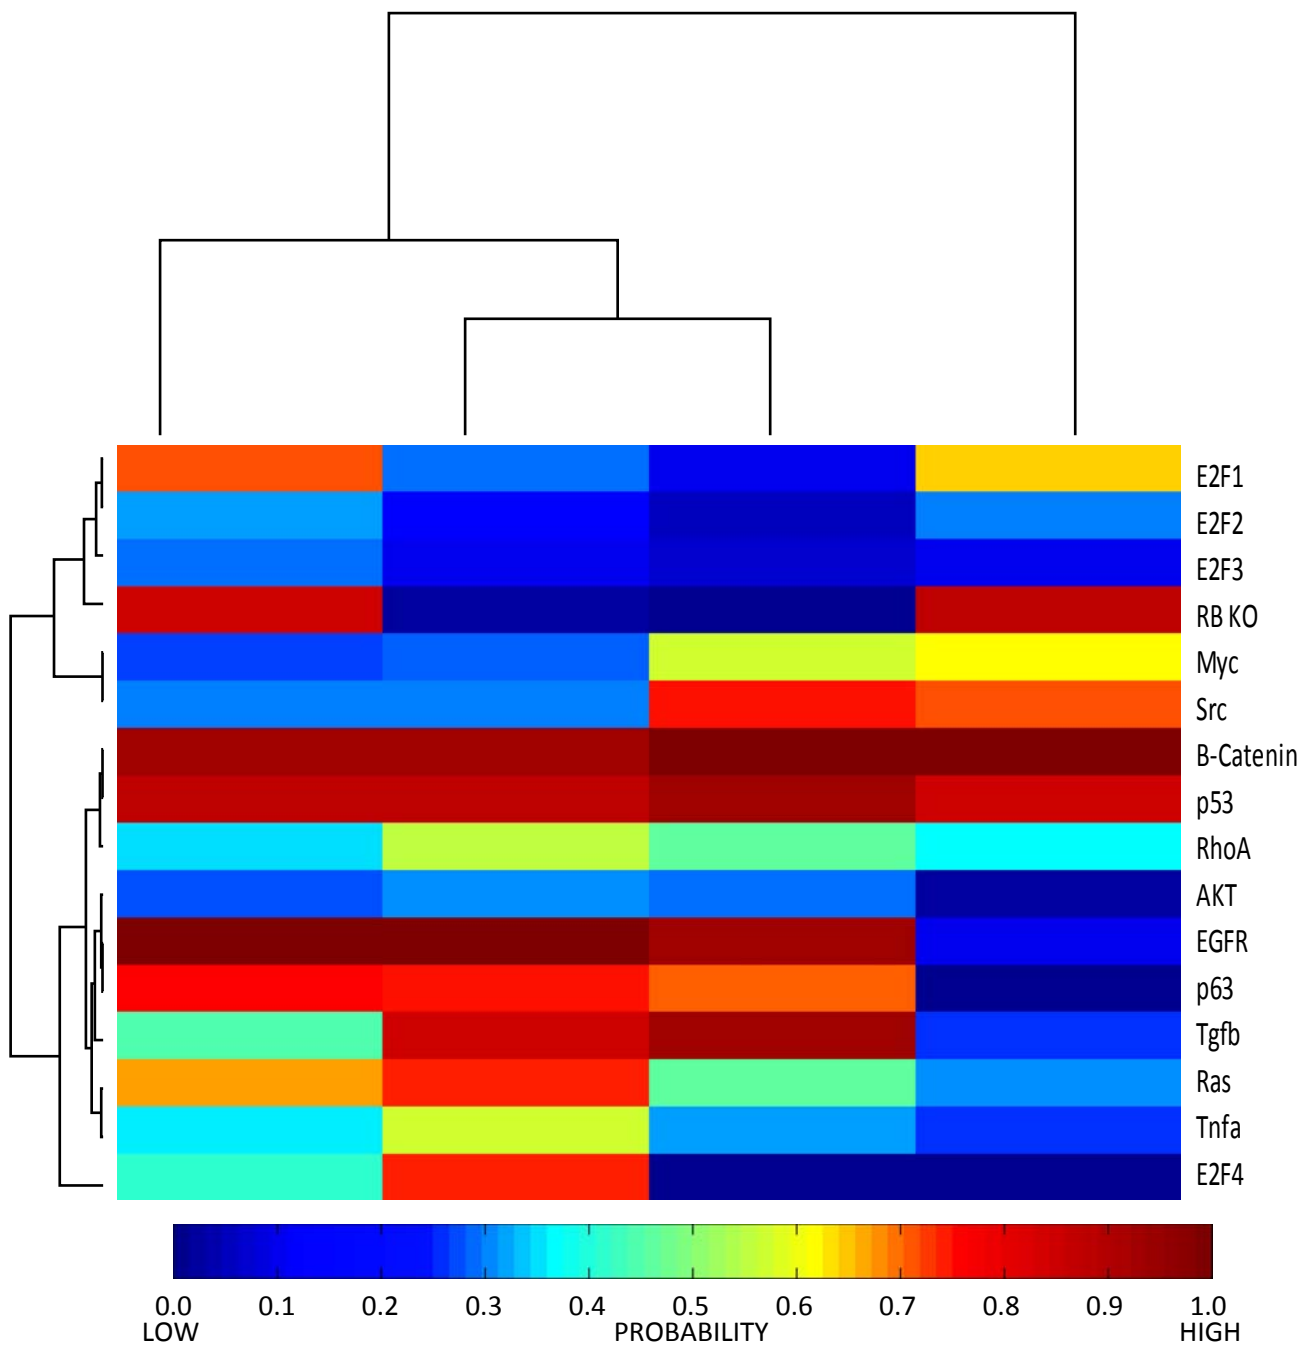

Supplement: MOESM12 [file 9704120]

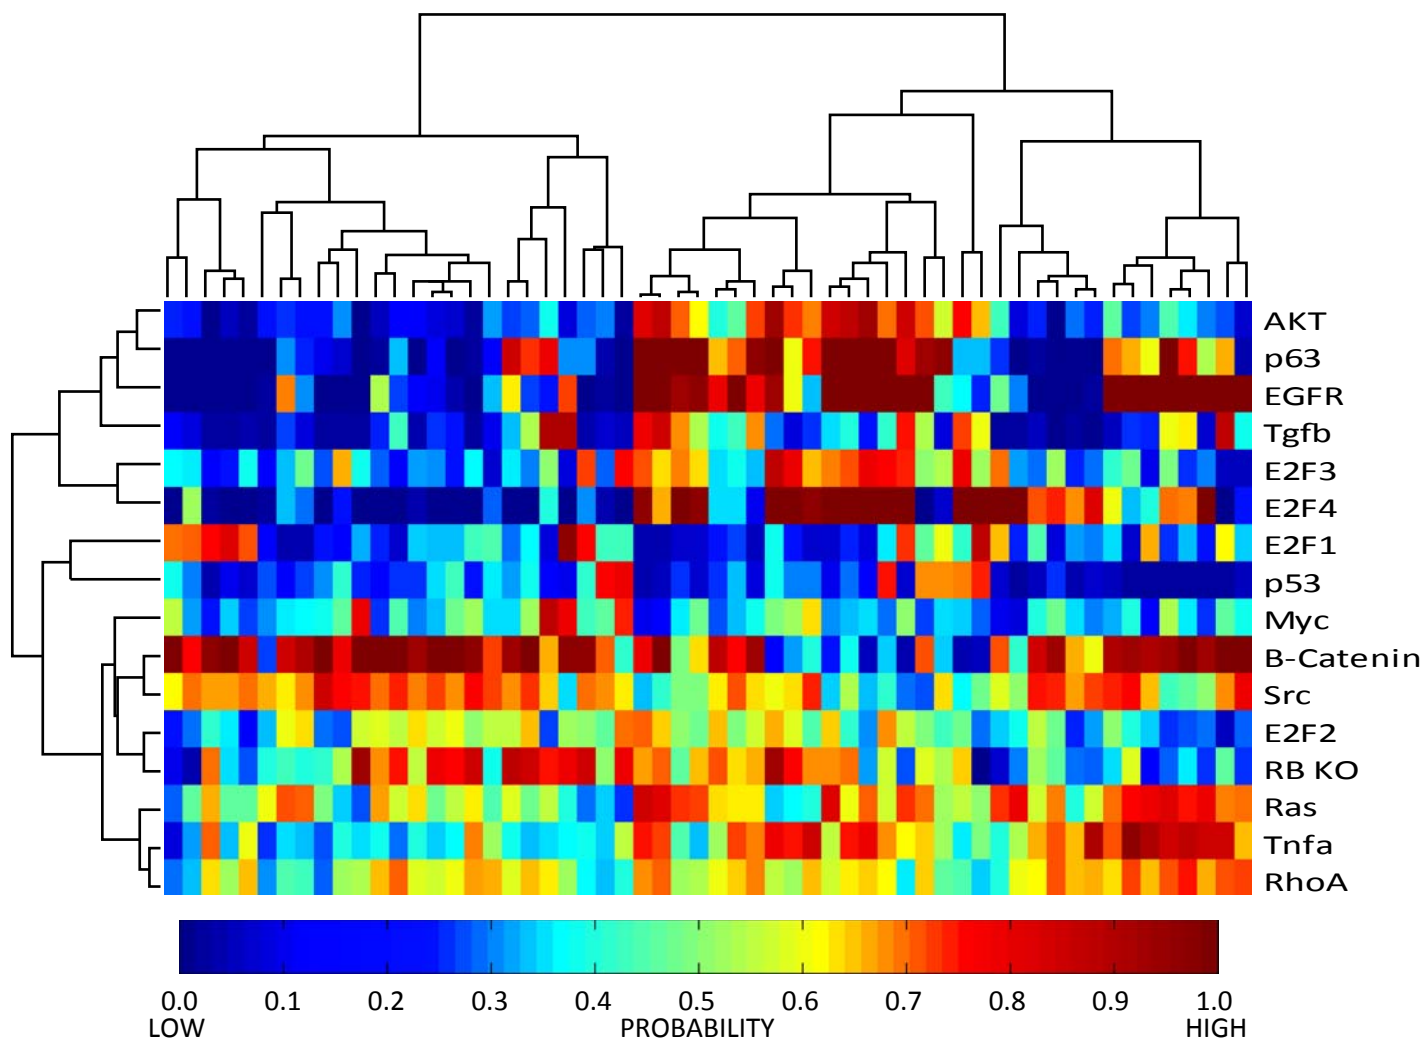

Supplement: MOESM12 [file 9704120]

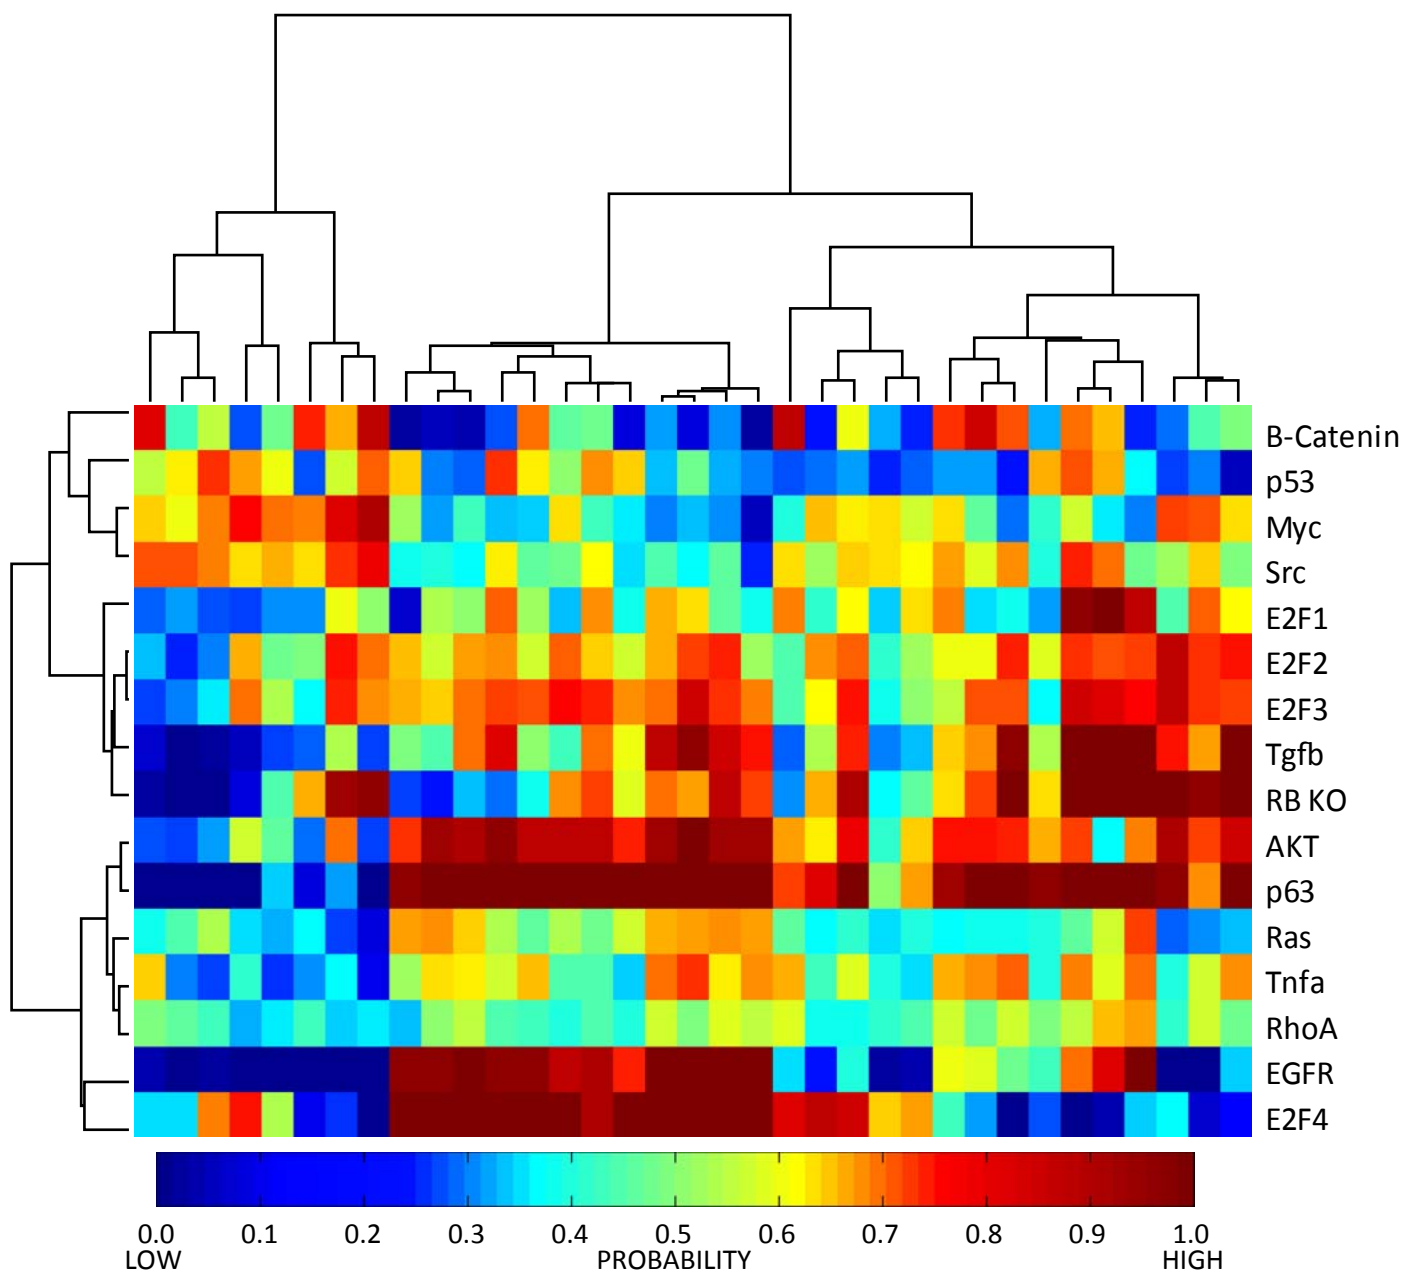

Supplement: MOESM12 [file 9704120]

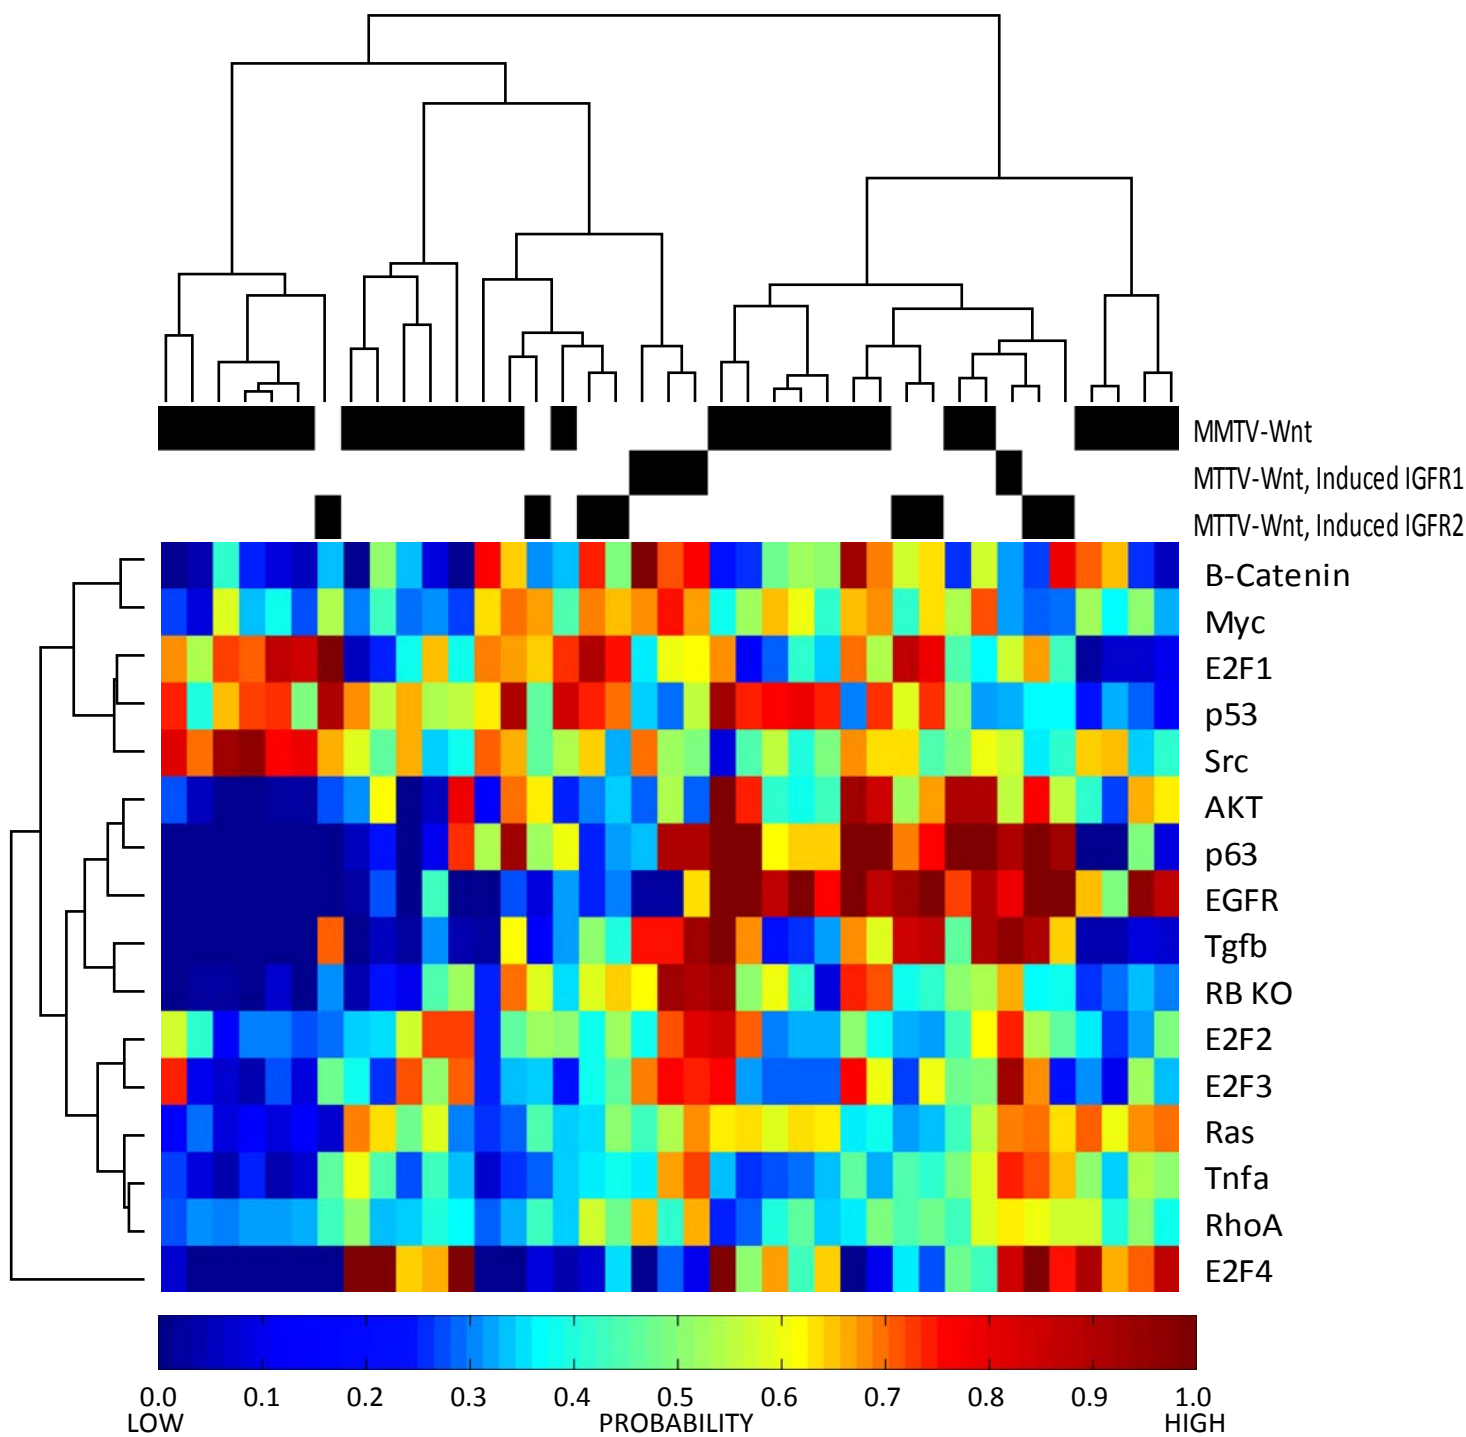

Supplement: MOESM12 [file 9704120]

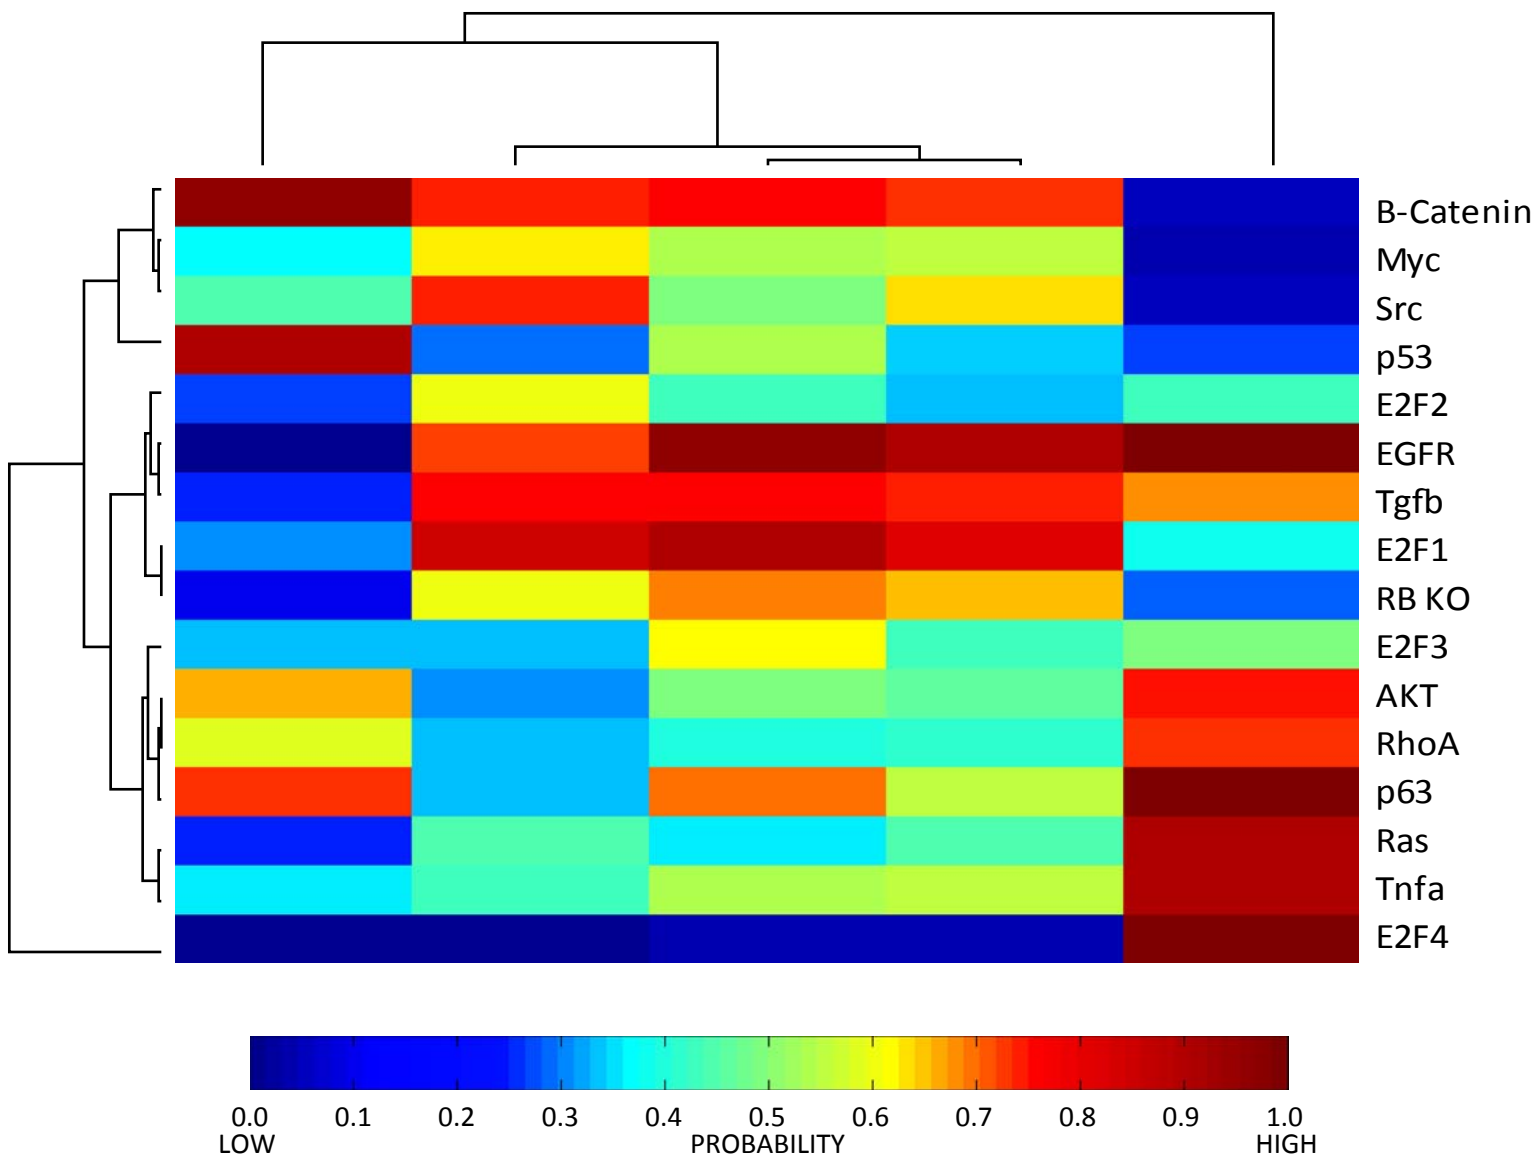

Supplement: MOESM12 [file 9704120]

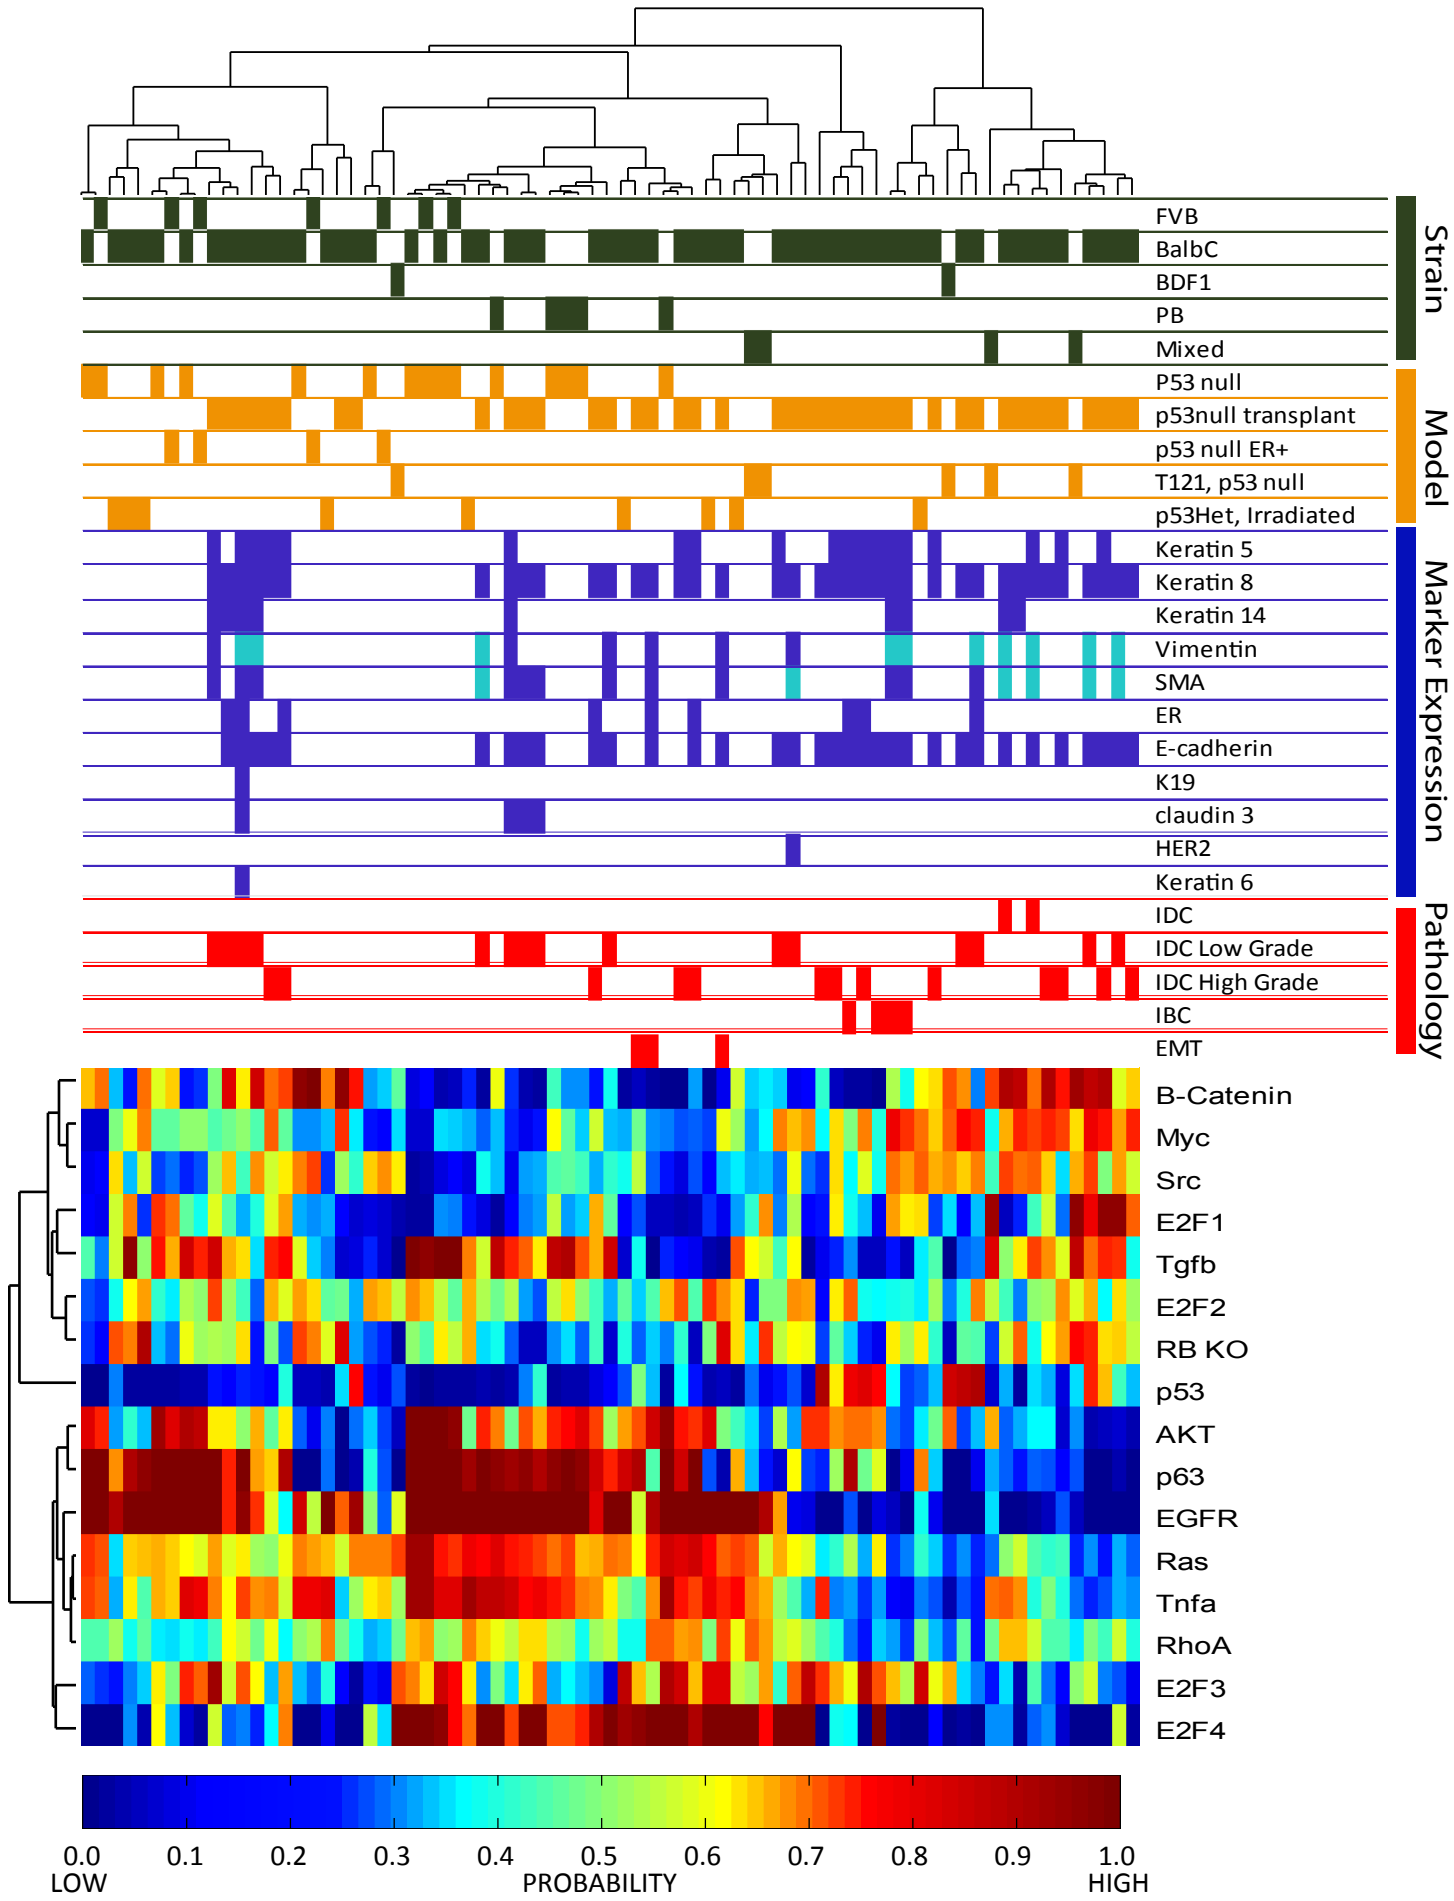

Supplement: MOESM12 [file 9704120]

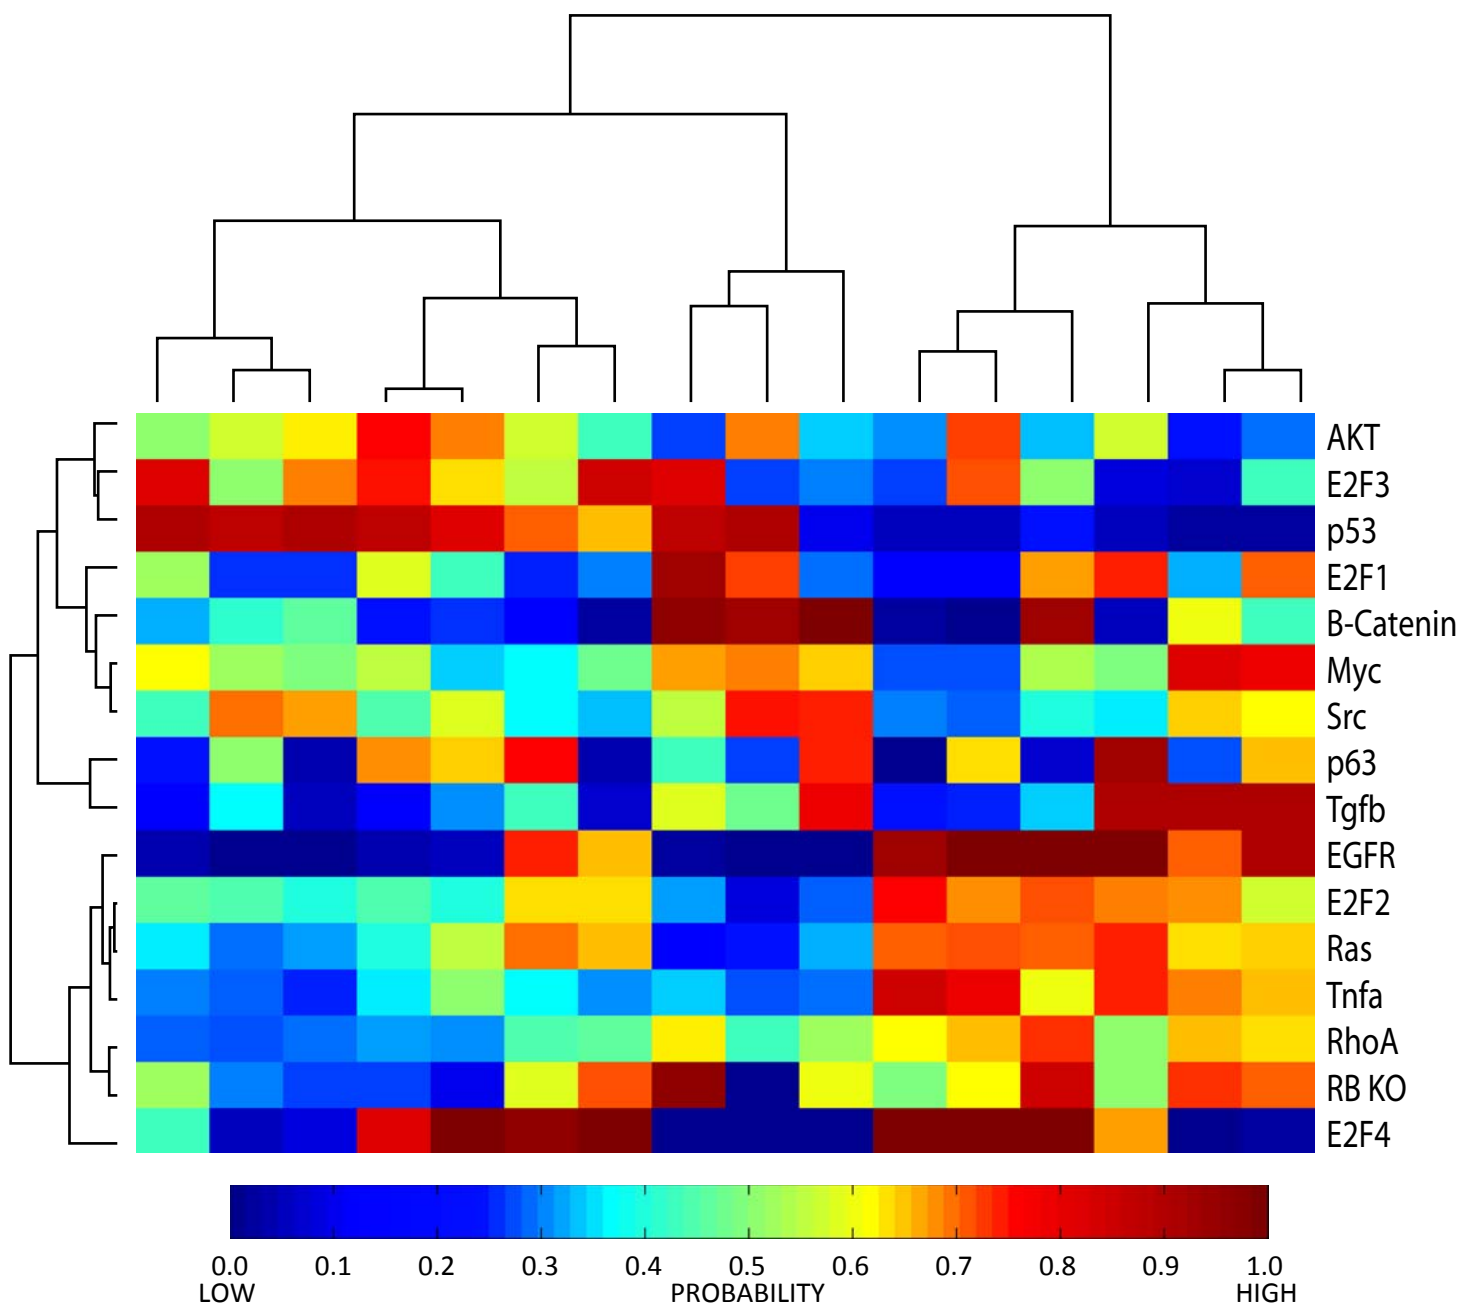

Supplement: MOESM12 [file 9704120]

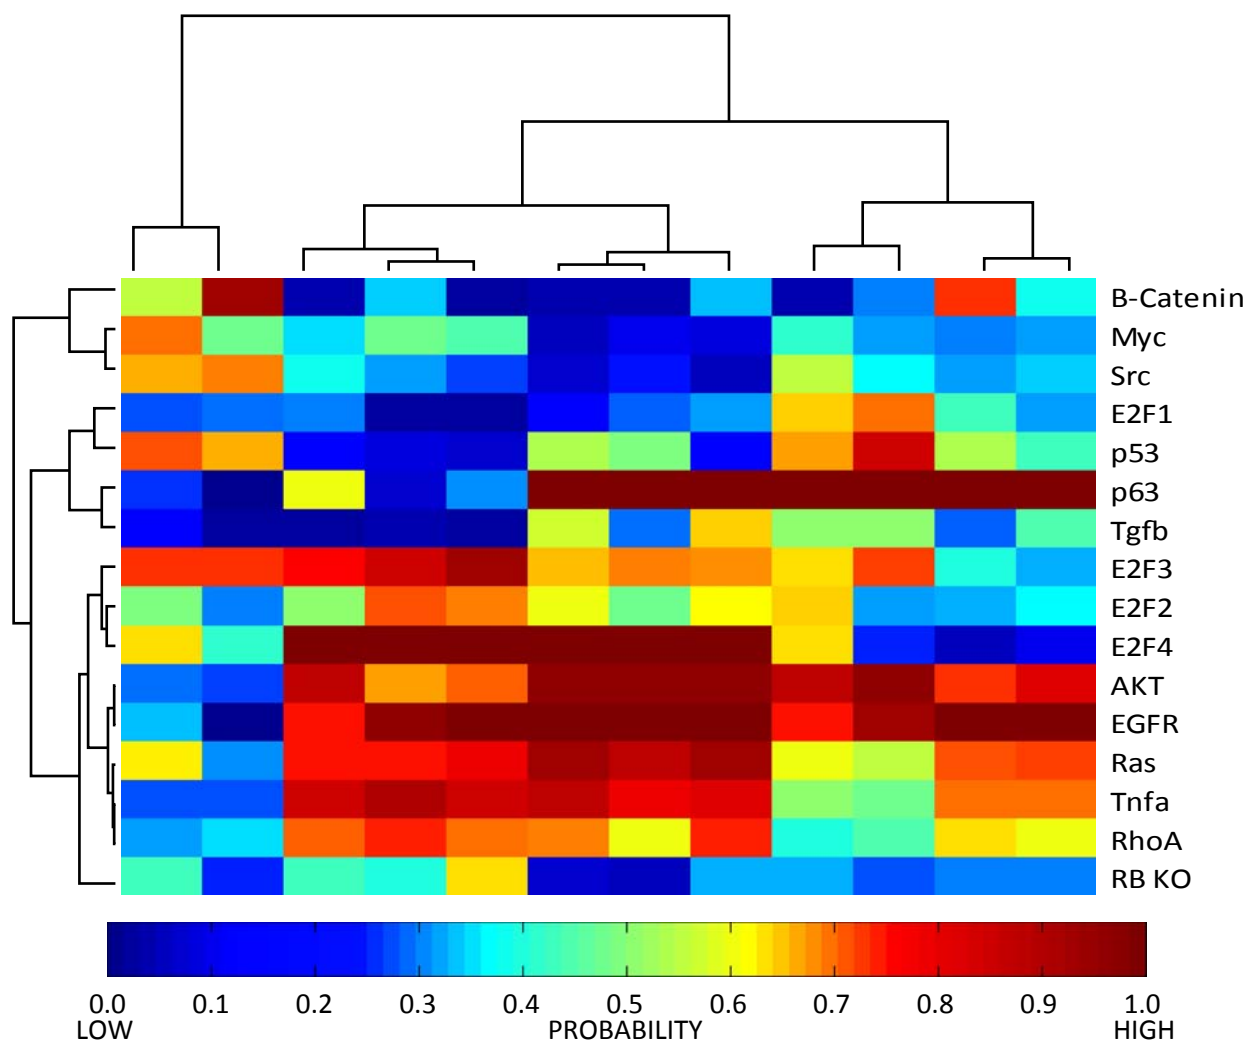

Supplement: MOESM12 [file 9704120]

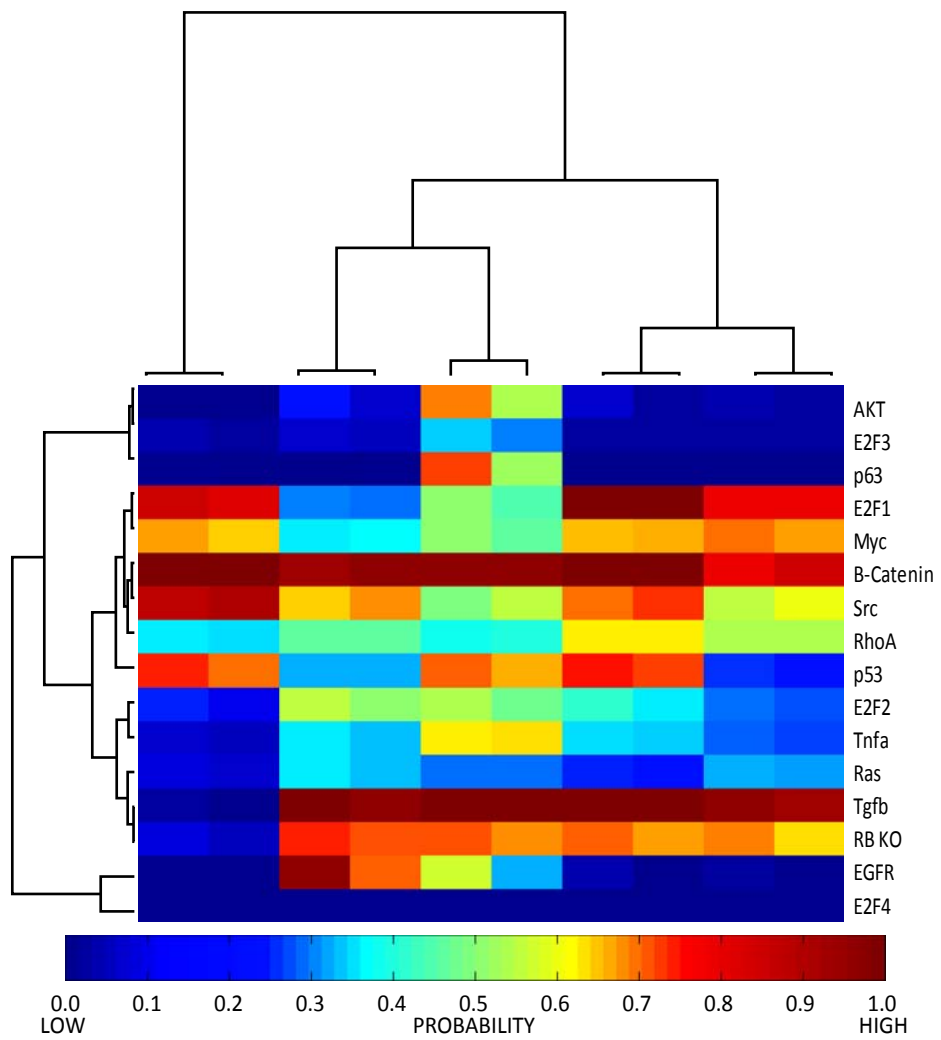

Supplement: MOESM12 [file 9704120]
